# Supplementary material
Source: publisher figshare collection journal article supplement (https://gsajournals.figshare.com/ndownloader/files/25917471)
Supplement: Supplementary file 1 [file 25917471]

## Sheet: All FRT
Category	Term	Count	%	PValue	Genes	List Total	Pop Hits	Pop Total	Fold Enrichment	Bonferroni	Benjamini	FDR
UP_KEYWORDS	Signal	131	30.3944	7.74063e-19	FBGN0043535, FBGN0250871, FBGN0011832, FBGN0032949, FBGN0033942, FBGN0085282, FBGN0032899, FBGN0003748, FBGN0032897, FBGN0032422, FBGN0034807, FBGN0035480, FBGN0031406, FBGN0261848, FBGN0031542, FBGN0041712, FBGN0039928, FBGN0004360, FBGN0032495, FBGN0020414, FBGN0020415, FBGN0037240, FBGN0020416, FBGN0085294, FBGN0034162, FBGN0051778, FBGN0031735, FBGN0035490, FBGN0027790, FBGN0034219, FBGN00839…	415	1182	7971	2.12872	1.35461e-16	1.35461e-16	9.48964e-16
UP_KEYWORDS	Disulfide bond	41	9.51276	1.90792e-07	FBGN0264975, FBGN0043535, FBGN0050371, FBGN0028956, FBGN0042186, FBGN0042187, FBGN0004629, FBGN0011832, FBGN0040736, FBGN0000490, FBGN0013997, FBGN0000635, FBGN0000636, FBGN0025631, FBGN0024234, FBGN0085410, FBGN0031571, FBGN0010238, FBGN0026199, FBGN0034538, FBGN0031406, FBGN0035798, FBGN0283461, FBGN0032006, FBGN0051681, FBGN0035678, FBGN0052277, FBGN0015777, FBGN0004360, FBGN0039688, FBGN00204…	415	322	7971	2.44564	3.3388e-05	1.66941e-05	0.000233901
GOTERM_CC_DIRECT	GO:0005615~extracellular space	30	6.96056	2.70036e-07	FBGN0004629, FBGN0034199, FBGN0003046, FBGN0000490, FBGN0033942, FBGN0027570, FBGN0044812, FBGN0041181, FBGN0034638, FBGN0026077, FBGN0041182, FBGN0053126, FBGN0024234, FBGN0041180, FBGN0002930, FBGN0026199, FBGN0031701, FBGN0034512, FBGN0034538, FBGN0035089, FBGN0028396, FBGN0085256, FBGN0033875, FBGN0051997, FBGN0004360, FBGN0260386, FBGN0032495, FBGN0034162, FBGN0035490, FBGN0025879	290	217	6122	2.91848	4.83353e-05	4.83353e-05	0.000332307
GOTERM_BP_DIRECT	GO:0060857~establishment of glial blood-brain barrier	10	2.32019	5.18318e-08	FBGN0264975, FBGN0013997, FBGN0015777, FBGN0025631, FBGN0004513, FBGN0010434, FBGN0037240, FBGN0010894, FBGN0037680, FBGN0033032	314	18	6328	11.196	4.86171e-05	4.86171e-05	8.12245e-05
GOTERM_CC_DIRECT	GO:0005919~pleated septate junction	6	1.39211	1.3081e-06	FBGN0264975, FBGN0013997, FBGN0025631, FBGN0004513, FBGN0037240, FBGN0033032	290	6	6122	21.1103	0.000234123	7.80469e-05	0.00160974
UP_SEQ_FEATURE	signal peptide	29	6.72854	2.60483e-07	FBGN0264975, FBGN0043535, FBGN0028956, FBGN0040736, FBGN0003046, FBGN0000490, FBGN0004003, FBGN0044812, FBGN0013997, FBGN0000635, FBGN0041182, FBGN0000636, FBGN0024234, FBGN0003748, FBGN0010238, FBGN0031701, FBGN0263930, FBGN0283461, FBGN0067903, FBGN0039928, FBGN0028396, FBGN0004360, FBGN0004055, FBGN0020414, FBGN0037240, FBGN0020415, FBGN0002306, FBGN0020416, FBGN0025879	104	217	2182	2.80388	7.84024e-05	7.84024e-05	0.00034826
GOTERM_CC_DIRECT	GO:0005886~plasma membrane	48	11.1369	1.86524e-06	FBGN0264975, FBGN0028956, FBGN0038237, FBGN0024980, FBGN0037012, FBGN0264607, FBGN0027570, FBGN0013997, FBGN0260798, FBGN0000635, FBGN0004921, FBGN0000636, FBGN0025631, FBGN0031571, FBGN0004907, FBGN0004167, FBGN0010238, FBGN0010894, FBGN0029768, FBGN0263930, FBGN0014020, FBGN0052068, FBGN0004513, FBGN0032006, FBGN0265274, FBGN0010434, FBGN0259214, FBGN0005631, FBGN0039927, FBGN0015795, FBGN00046…	290	494	6122	2.05121	0.000333822	8.34661e-05	0.00229534
GOTERM_CC_DIRECT	GO:0005887~integral component of plasma membrane	31	7.19258	9.52745e-07	FBGN0015577, FBGN0051100, FBGN0035696, FBGN0037680, FBGN0013997, FBGN0000636, FBGN0085410, FBGN0025631, FBGN0014073, FBGN0040324, FBGN0029507, FBGN0029506, FBGN0266758, FBGN0025709, FBGN0259214, FBGN0031936, FBGN0005631, FBGN0030360, FBGN0032075, FBGN0039928, FBGN0027584, FBGN0033134, FBGN0033136, FBGN0033135, FBGN0052000, FBGN0025936, FBGN0002306, FBGN0015872, FBGN0003892, FBGN0035976, FBGN00359…	290	243	6122	2.69309	0.000170527	8.52671e-05	0.00117244
GOTERM_BP_DIRECT	GO:0061343~cell adhesion involved in heart morphogenesis	8	1.85615	1.88554e-07	FBGN0264975, FBGN0013997, FBGN0004921, FBGN0015777, FBGN0010434, FBGN0037240, FBGN0010238, FBGN0010894	314	11	6328	14.6566	0.000176848	8.84279e-05	0.000295479
GOTERM_CC_DIRECT	GO:0005918~septate junction	10	2.32019	4.46724e-06	FBGN0264975, FBGN0013997, FBGN0015777, FBGN0000636, FBGN0031571, FBGN0010434, FBGN0037240, FBGN0010238, FBGN0010894, FBGN0033032	290	29	6122	7.27943	0.000799318	0.000159915	0.00549726
UP_SEQ_FEATURE	disulfide bond	21	4.87239	8.56453e-06	FBGN0264975, FBGN0043535, FBGN0028956, FBGN0283461, FBGN0004629, FBGN0040736, FBGN0000490, FBGN0000635, FBGN0013997, FBGN0015777, FBGN0000636, FBGN0024234, FBGN0025631, FBGN0020414, FBGN0037240, FBGN0020415, FBGN0020416, FBGN0010238, FBGN0035976, FBGN0025879, FBGN0035975	104	147	2182	2.99725	0.00257461	0.00128814	0.01145
GOTERM_CC_DIRECT	GO:0016021~integral component of membrane	103	23.8979	4.96095e-05	FBGN0265082, FBGN0250871, FBGN0032949, FBGN0051100, FBGN0058178, FBGN0052576, FBGN0259717, FBGN0263316, FBGN0004907, FBGN0028527, FBGN0032899, FBGN0010894, FBGN0032897, FBGN0029507, FBGN0033032, FBGN0029506, FBGN0266758, FBGN0031936, FBGN0039927, FBGN0039928, FBGN0035755, FBGN0034219, FBGN0264975, FBGN0038420, FBGN0036433, FBGN0013997, FBGN0025631, FBGN0040658, FBGN0052640, FBGN0052641, FBGN00297…	290	1537	6122	1.41468	0.00884101	0.00147896	0.0610325
GOTERM_MF_DIRECT	GO:0003779~actin binding	17	3.94432	7.32402e-06	FBGN0283471, FBGN0028371, FBGN0010434, FBGN0039897, FBGN0020503, FBGN0013733, FBGN0035499, FBGN0004117, FBGN0004167, FBGN0000244, FBGN0052311, FBGN0030749, FBGN0028894, FBGN0085446, FBGN0000083, FBGN0085408, FBGN0026379	263	98	5738	3.78467	0.00196823	0.00196823	0.00962375
INTERPRO	IPR004827:Basic-leucine zipper domain	8	1.85615	6.02624e-06	FBGN0000370, FBGN0016694, FBGN0033010, FBGN0016076, FBGN0004396, FBGN0034534, FBGN0001297, FBGN0032202	331	17	7043	10.0132	0.00318281	0.00318281	0.00874645
UP_SEQ_FEATURE	propeptide:Removed in mature form	8	1.85615	4.04873e-05	FBGN0004921, FBGN0038237, FBGN0037240, FBGN0010238, FBGN0003206, FBGN0263930, FBGN0014020, FBGN0014011	104	22	2182	7.62937	0.012113	0.00405406	0.0541171
GOTERM_BP_DIRECT	GO:0019991~septate junction assembly	10	2.32019	1.61445e-05	FBGN0264975, FBGN0013997, FBGN0015777, FBGN0025631, FBGN0010434, FBGN0037240, FBGN0010238, FBGN0010894, FBGN0037680, FBGN0033032	314	32	6328	6.29777	0.0150296	0.00503518	0.0252968
SMART	SM00338:BRLZ	7	1.62413	5.03614e-05	FBGN0000370, FBGN0016694, FBGN0033010, FBGN0016076, FBGN0004396, FBGN0034534, FBGN0001297	196	13	3269	8.98077	0.00727599	0.00727599	0.0597706
UP_KEYWORDS	Lipoprotein	11	2.5522	0.000141488	FBGN0000635, FBGN0004360, FBGN0004921, FBGN0038237, FBGN0037240, FBGN0010238, FBGN0003206, FBGN0010348, FBGN0263930, FBGN0014020, FBGN0014011	415	48	7971	4.40166	0.024458	0.00822006	0.173319
GOTERM_MF_DIRECT	GO:0043565~sequence-specific DNA binding	19	4.40835	8.43362e-05	FBGN0016694, FBGN0033010, FBGN0014018, FBGN0026411, FBGN0000504, FBGN0004396, FBGN0267033, FBGN0011274, FBGN0032202, FBGN0023214, FBGN0008651, FBGN0000014, FBGN0000015, FBGN0000567, FBGN0085432, FBGN0016076, FBGN0022361, FBGN0001297, FBGN0034534	263	144	5738	2.8787	0.022432	0.0112796	0.110766
UP_KEYWORDS	Cell membrane	22	5.10441	0.000272565	FBGN0264975, FBGN0028956, FBGN0038237, FBGN0265274, FBGN0039927, FBGN0039928, FBGN0032230, FBGN0000635, FBGN0004921, FBGN0025631, FBGN0085410, FBGN0031571, FBGN0037240, FBGN0032682, FBGN0010238, FBGN0003206, FBGN0029768, FBGN0263930, FBGN0034219, FBGN0035975, FBGN0014020, FBGN0014011	415	175	7971	2.41462	0.0465853	0.0118555	0.333639
GOTERM_BP_DIRECT	GO:0009617~response to bacterium	10	2.32019	7.21219e-05	FBGN0035089, FBGN0283461, FBGN0014018, FBGN0040736, FBGN0067903, FBGN0028396, FBGN0031701, FBGN0035976, FBGN0044812, FBGN0035975	314	38	6328	5.30339	0.0654151	0.0134394	0.112961
UP_SEQ_FEATURE	glycosylation site:N-linked (GlcNAc...)	25	5.80046	0.000180054	FBGN0264975, FBGN0028956, FBGN0000490, FBGN0000635, FBGN0013997, FBGN0000636, FBGN0024234, FBGN0003748, FBGN0010238, FBGN0263930, FBGN0283461, FBGN0004513, FBGN0039928, FBGN0028396, FBGN0004360, FBGN0015777, FBGN0004055, FBGN0020414, FBGN0020415, FBGN0037240, FBGN0002306, FBGN0020416, FBGN0003892, FBGN0035976, FBGN0035975	104	239	2182	2.19464	0.0527584	0.0134589	0.24046
UP_SEQ_FEATURE	topological domain:Extracellular	16	3.7123	0.000265103	FBGN0264975, FBGN0028956, FBGN0004513, FBGN0265274, FBGN0039928, FBGN0000635, FBGN0013997, FBGN0015777, FBGN0000636, FBGN0025631, FBGN0004055, FBGN0002306, FBGN0015872, FBGN0003892, FBGN0035976, FBGN0035975	104	117	2182	2.86917	0.0767051	0.0158346	0.353857
GOTERM_BP_DIRECT	GO:0007424~open tracheal system development	15	3.48028	7.01466e-05	FBGN0001168, FBGN0000490, FBGN0013733, FBGN0004635, FBGN0020521, FBGN0000015, FBGN0004360, FBGN0015777, FBGN0004858, FBGN0016076, FBGN0010238, FBGN0010894, FBGN0053196, FBGN0014020, FBGN0014011	314	86	6328	3.51503	0.0636817	0.0163154	0.109869
UP_KEYWORDS	Glycoprotein	29	6.72854	0.000615633	FBGN0264975, FBGN0032536, FBGN0028956, FBGN0000490, FBGN0013997, FBGN0000635, FBGN0000636, FBGN0085410, FBGN0024234, FBGN0031571, FBGN0003748, FBGN0010238, FBGN0263930, FBGN0004513, FBGN0039928, FBGN0028396, FBGN0004360, FBGN0015777, FBGN0004055, FBGN0020414, FBGN0037240, FBGN0020415, FBGN0032682, FBGN0002306, FBGN0020416, FBGN0003892, FBGN0034219, FBGN0035976, FBGN0035975	415	280	7971	1.98932	0.102165	0.0213232	0.752126
UP_KEYWORDS	Membrane	125	29.0023	0.000965711	FBGN0038680, FBGN0265082, FBGN0250871, FBGN0032949, FBGN0058178, FBGN0051100, FBGN0052576, FBGN0035696, FBGN0259717, FBGN0263316, FBGN0004907, FBGN0028527, FBGN0032899, FBGN0010894, FBGN0032897, FBGN0029507, FBGN0014020, FBGN0033032, FBGN0029506, FBGN0266758, FBGN0031936, FBGN0039927, FBGN0039928, FBGN0035755, FBGN0037240, FBGN0034219, FBGN0014011, FBGN0264975, FBGN0038420, FBGN0039890, FBGN00364…	415	1865	7971	1.28735	0.15556	0.0277868	1.1775
INTERPRO	IPR013783:Immunoglobulin-like fold	15	3.48028	0.000121103	FBGN0264975, FBGN0036454, FBGN0032006, FBGN0028371, FBGN0014018, FBGN0005631, FBGN0011274, FBGN0000635, FBGN0034723, FBGN0000636, FBGN0037240, FBGN0025936, FBGN0002306, FBGN0010238, FBGN0052311	331	95	7043	3.35968	0.0620584	0.0315262	0.175632
GOTERM_BP_DIRECT	GO:0035151~regulation of tube size, open tracheal system	7	1.62413	0.000218971	FBGN0264975, FBGN0026077, FBGN0013997, FBGN0015777, FBGN0010434, FBGN0010238, FBGN0010894	314	19	6328	7.42474	0.185692	0.0336567	0.342594
UP_KEYWORDS	Immunoglobulin domain	7	1.62413	0.00220566	FBGN0264975, FBGN0000635, FBGN0036454, FBGN0000636, FBGN0032006, FBGN0037240, FBGN0010238	415	27	7971	4.97965	0.320513	0.0537064	2.67071
UP_KEYWORDS	Transmembrane	109	25.29	0.00311872	FBGN0265082, FBGN0250871, FBGN0032949, FBGN0051100, FBGN0058178, FBGN0035696, FBGN0052576, FBGN0259717, FBGN0263316, FBGN0004907, FBGN0028527, FBGN0032899, FBGN0010894, FBGN0032897, FBGN0029507, FBGN0033032, FBGN0029506, FBGN0266758, FBGN0031936, FBGN0039927, FBGN0039928, FBGN0035755, FBGN0034219, FBGN0264975, FBGN0038420, FBGN0039890, FBGN0036433, FBGN0013997, FBGN0025631, FBGN0040658, FBGN00526…	415	1638	7971	1.27814	0.421102	0.0589288	3.75698
UP_KEYWORDS	Transmembrane helix	109	25.29	0.00293304	FBGN0265082, FBGN0250871, FBGN0032949, FBGN0051100, FBGN0058178, FBGN0035696, FBGN0052576, FBGN0259717, FBGN0263316, FBGN0004907, FBGN0028527, FBGN0032899, FBGN0010894, FBGN0032897, FBGN0029507, FBGN0033032, FBGN0029506, FBGN0266758, FBGN0031936, FBGN0039927, FBGN0039928, FBGN0035755, FBGN0034219, FBGN0264975, FBGN0038420, FBGN0039890, FBGN0036433, FBGN0013997, FBGN0025631, FBGN0040658, FBGN00526…	415	1635	7971	1.28048	0.401923	0.0622337	3.53698
INTERPRO	IPR001314:Peptidase S1A, chymotrypsin-type	12	2.78422	0.000365031	FBGN0037627, FBGN0031406, FBGN0050371, FBGN0042186, FBGN0042187, FBGN0011832, FBGN0051681, FBGN0052834, FBGN0035678, FBGN0052277, FBGN0264253, FBGN0034807	331	70	7043	3.64765	0.175631	0.0623504	0.528522
GOTERM_MF_DIRECT	GO:0004252~serine-type endopeptidase activity	13	3.01624	0.000723941	FBGN0037627, FBGN0031406, FBGN0050371, FBGN0042186, FBGN0042187, FBGN0011832, FBGN0051681, FBGN0052834, FBGN0035678, FBGN0052277, FBGN0004635, FBGN0034807, FBGN0264253	263	90	5738	3.15142	0.177009	0.0628734	0.94713
INTERPRO	IPR001254:Peptidase S1	12	2.78422	0.000596438	FBGN0037627, FBGN0031406, FBGN0050371, FBGN0042186, FBGN0042187, FBGN0011832, FBGN0051681, FBGN0052834, FBGN0035678, FBGN0052277, FBGN0264253, FBGN0034807	331	74	7043	3.45048	0.270656	0.0758699	0.862222
GOTERM_BP_DIRECT	GO:0008362~chitin-based embryonic cuticle biosynthetic process	6	1.39211	0.000797204	FBGN0026077, FBGN0243512, FBGN0010434, FBGN0250871, FBGN0053196, FBGN0020521	314	16	6328	7.55732	0.526724	0.101356	1.242
INTERPRO	IPR009003:Trypsin-like cysteine/serine peptidase domain	12	2.78422	0.0010464	FBGN0037627, FBGN0031406, FBGN0050371, FBGN0042186, FBGN0042187, FBGN0011832, FBGN0051681, FBGN0052834, FBGN0035678, FBGN0052277, FBGN0264253, FBGN0034807	331	79	7043	3.23209	0.425258	0.104853	1.50811
GOTERM_MF_DIRECT	GO:0003700~transcription factor activity, sequence-specific DNA binding	18	4.17633	0.0016944	FBGN0000370, FBGN0016694, FBGN0033010, FBGN0014018, FBGN0000504, FBGN0266450, FBGN0004396, FBGN0011274, FBGN0032202, FBGN0261703, FBGN0000014, FBGN0003345, FBGN0000015, FBGN0259938, FBGN0000567, FBGN0001297, FBGN0034534, FBGN0053196	263	169	5738	2.32376	0.3663	0.107782	2.20378
GOTERM_CC_DIRECT	GO:0045169~fusome	7	1.62413	0.0053554	FBGN0010434, FBGN0011747, FBGN0020503, FBGN0003892, FBGN0013733, FBGN0086656, FBGN0029506	290	35	6122	4.22207	0.617563	0.113212	6.39447
UP_SEQ_FEATURE	domain:Ig-like C2-type 2	5	1.16009	0.00240871	FBGN0264975, FBGN0000635, FBGN0000636, FBGN0037240, FBGN0010238	104	13	2182	8.06953	0.516109	0.113951	3.17286
UP_SEQ_FEATURE	domain:Ig-like C2-type 1	5	1.16009	0.00240871	FBGN0264975, FBGN0000635, FBGN0000636, FBGN0037240, FBGN0010238	104	13	2182	8.06953	0.516109	0.113951	3.17286
KEGG_PATHWAY	dme04350:TGF-beta signaling pathway	5	1.16009	0.0026678	FBGN0000575, FBGN0024234, FBGN0000490, FBGN0003256, FBGN0014020	50	26	2103	8.08846	0.115633	0.115633	2.49331
KEGG_PATHWAY	dme04391:Hippo signaling pathway - fly	6	1.39211	0.0053697	FBGN0003345, FBGN0004907, FBGN0011642, FBGN0000229, FBGN0263930, FBGN0032230	50	50	2103	5.0472	0.219384	0.116475	4.96169
GOTERM_CC_DIRECT	GO:0031225~anchored component of membrane	4	0.928074	0.00488395	FBGN0000635, FBGN0037240, FBGN0010238, FBGN0263930	290	8	6122	10.5552	0.583708	0.117676	5.84702
GOTERM_BP_DIRECT	GO:0007166~cell surface receptor signaling pathway	9	2.08817	0.00121847	FBGN0033136, FBGN0033135, FBGN0028956, FBGN0025631, FBGN0032075, FBGN0029507, FBGN0034219, FBGN0033134, FBGN0029506	314	44	6328	4.12218	0.681338	0.119327	1.89247
GOTERM_BP_DIRECT	GO:0007391~dorsal closure	13	3.01624	0.00108749	FBGN0243512, FBGN0013997, FBGN0000575, FBGN0004921, FBGN0024234, FBGN0010434, FBGN0265274, FBGN0000490, FBGN0001297, FBGN0000229, FBGN0010894, FBGN0014020, FBGN0014011	314	87	6328	3.01135	0.639629	0.119775	1.69065
UP_KEYWORDS	Methylation	6	1.39211	0.00981358	FBGN0283471, FBGN0004921, FBGN0038237, FBGN0003206, FBGN0014020, FBGN0014011	415	26	7971	4.43244	0.82198	0.124323	11.3881
INTERPRO	IPR003598:Immunoglobulin subtype 2	9	2.08817	0.00178695	FBGN0264975, FBGN0000635, FBGN0034723, FBGN0036454, FBGN0032006, FBGN0037240, FBGN0005631, FBGN0010238, FBGN0052311	331	49	7043	3.90819	0.611764	0.126427	2.56259
INTERPRO	IPR003599:Immunoglobulin subtype	9	2.08817	0.00204251	FBGN0264975, FBGN0000635, FBGN0034723, FBGN0036454, FBGN0032006, FBGN0037240, FBGN0005631, FBGN0010238, FBGN0052311	331	50	7043	3.83003	0.660945	0.126458	2.92404
UP_KEYWORDS	Sodium transport	4	0.928074	0.0092391	FBGN0015777, FBGN0040297, FBGN0026787, FBGN0024315	415	9	7971	8.53655	0.802962	0.126601	10.7558
INTERPRO	IPR007110:Immunoglobulin-like domain	10	2.32019	0.00154119	FBGN0264975, FBGN0000635, FBGN0034723, FBGN0036454, FBGN0000636, FBGN0032006, FBGN0037240, FBGN0005631, FBGN0010238, FBGN0052311	331	59	7043	3.60643	0.557767	0.127145	2.21382
UP_KEYWORDS	Prenylation	5	1.16009	0.00792651	FBGN0004921, FBGN0038237, FBGN0003206, FBGN0014020, FBGN0014011	415	16	7971	6.00226	0.751588	0.130004	9.29542
UP_KEYWORDS	Innate immunity	9	2.08817	0.0087234	FBGN0014018, FBGN0040736, FBGN0067903, FBGN0262579, FBGN0028396, FBGN0031701, FBGN0035976, FBGN0044812, FBGN0035975	415	57	7971	3.03272	0.784176	0.130111	10.1846
UP_KEYWORDS	Immunity	9	2.08817	0.0129906	FBGN0014018, FBGN0040736, FBGN0067903, FBGN0262579, FBGN0028396, FBGN0031701, FBGN0035976, FBGN0044812, FBGN0035975	415	61	7971	2.83385	0.898556	0.13326	14.8114
UP_KEYWORDS	Secreted	15	3.48028	0.0114975	FBGN0004360, FBGN0283461, FBGN0024234, FBGN0265267, FBGN0020414, FBGN0020415, FBGN0040736, FBGN0067903, FBGN0000490, FBGN0020416, FBGN0028396, FBGN0026199, FBGN0031701, FBGN0044812, FBGN0025879	415	137	7971	2.10298	0.867837	0.134589	13.2179
UP_KEYWORDS	Sodium	4	0.928074	0.0126962	FBGN0015777, FBGN0040297, FBGN0026787, FBGN0024315	415	10	7971	7.68289	0.893121	0.138492	14.4993
UP_KEYWORDS	GPI-anchor	4	0.928074	0.0126962	FBGN0000635, FBGN0037240, FBGN0010238, FBGN0263930	415	10	7971	7.68289	0.893121	0.138492	14.4993
UP_KEYWORDS	Cell adhesion	7	1.62413	0.0143859	FBGN0264975, FBGN0000635, FBGN0013997, FBGN0000636, FBGN0037240, FBGN0039928, FBGN0010238	415	39	7971	3.44745	0.920803	0.138573	16.276
INTERPRO	IPR013098:Immunoglobulin I-set	7	1.62413	0.00275236	FBGN0264975, FBGN0000635, FBGN0034723, FBGN0032006, FBGN0005631, FBGN0010238, FBGN0052311	331	31	7043	4.8047	0.767301	0.14956	3.92148
UP_KEYWORDS	Developmental protein	33	7.65661	0.0169415	FBGN0264975, FBGN0265623, FBGN0000490, FBGN0004003, FBGN0000635, FBGN0000636, FBGN0024234, FBGN0085432, FBGN0004907, FBGN0000229, FBGN0010238, FBGN0014020, FBGN0001168, FBGN0004893, FBGN0265274, FBGN0010434, FBGN0266450, FBGN0263995, FBGN0004635, FBGN0000014, FBGN0003345, FBGN0000015, FBGN0004360, FBGN0020414, FBGN0004055, FBGN0000567, FBGN0020415, FBGN0004858, FBGN0002306, FBGN0020416, FBGN00038…	415	418	7971	1.51636	0.949721	0.153056	18.899
KEGG_PATHWAY	dme04068:FoxO signaling pathway	5	1.16009	0.0164685	FBGN0052672, FBGN0037007, FBGN0000229, FBGN0003256, FBGN0026379	50	43	2103	4.8907	0.534133	0.173838	14.5255
INTERPRO	IPR001507:Zona pellucida domain	4	0.928074	0.00478686	FBGN0250871, FBGN0037796, FBGN0053196, FBGN0020521	331	8	7043	10.639	0.921002	0.177376	6.72759
INTERPRO	IPR000301:Tetraspanin	6	1.39211	0.00445666	FBGN0033136, FBGN0033135, FBGN0032075, FBGN0029507, FBGN0033134, FBGN0029506	331	24	7043	5.31949	0.905848	0.17873	6.27741
INTERPRO	IPR015897:CHK kinase-like	7	1.62413	0.00382656	FBGN0051436, FBGN0039328, FBGN0039316, FBGN0051370, FBGN0051300, FBGN0051102, FBGN0045761	331	33	7043	4.5135	0.868419	0.183569	5.41273
INTERPRO	IPR004119:Protein of unknown function DUF227	7	1.62413	0.00382656	FBGN0051436, FBGN0039328, FBGN0039316, FBGN0051370, FBGN0051300, FBGN0051102, FBGN0045761	331	33	7043	4.5135	0.868419	0.183569	5.41273
INTERPRO	IPR018114:Peptidase S1, trypsin family, active site	9	2.08817	0.00423586	FBGN0031406, FBGN0050371, FBGN0042186, FBGN0042187, FBGN0011832, FBGN0051681, FBGN0035678, FBGN0052277, FBGN0264253	331	56	7043	3.41967	0.894129	0.184651	5.97526
PIR_SUPERFAMILY	PIRSF002419:tetraspanin	4	0.928074	0.0137839	FBGN0032075, FBGN0029507, FBGN0033134, FBGN0029506	18	20	634	7.04444	0.187953	0.187953	9.19908
KEGG_PATHWAY	dme04711:Circadian rhythm - fly	3	0.696056	0.0136183	FBGN0016694, FBGN0016076, FBGN0014396	50	8	2103	15.7725	0.467805	0.189617	12.1555
GOTERM_MF_DIRECT	GO:0001077~transcriptional activator activity, RNA polymerase II core promoter proximal region sequence-specific binding	7	1.62413	0.00391022	FBGN0016694, FBGN0000567, FBGN0014018, FBGN0085432, FBGN0000504, FBGN0001297, FBGN0011274	263	34	5738	4.49184	0.651428	0.19005	5.01805
UP_SEQ_FEATURE	topological domain:Cytoplasmic	18	4.17633	0.00509578	FBGN0264975, FBGN0028956, FBGN0004513, FBGN0265274, FBGN0024980, FBGN0039928, FBGN0004635, FBGN0000635, FBGN0013997, FBGN0015777, FBGN0000636, FBGN0025631, FBGN0004055, FBGN0002306, FBGN0015872, FBGN0003892, FBGN0035976, FBGN0035975	104	186	2182	2.0304	0.785136	0.197223	6.60233
GOTERM_CC_DIRECT	GO:0044295~axonal growth cone	3	0.696056	0.0125081	FBGN0005631, FBGN0020503, FBGN0013733	290	4	6122	15.8328	0.894924	0.201729	14.3496
GOTERM_CC_DIRECT	GO:0005576~extracellular region	19	4.40835	0.0114473	FBGN0035089, FBGN0043535, FBGN0283461, FBGN0265267, FBGN0040736, FBGN0067903, FBGN0039928, FBGN0036361, FBGN0044812, FBGN0004360, FBGN0260386, FBGN0024234, FBGN0020414, FBGN0020415, FBGN0020416, FBGN0026199, FBGN0031701, FBGN0025879, FBGN0063923	290	213	6122	1.88308	0.872659	0.204662	13.2104
INTERPRO	IPR019565:Alpha-2-macroglobulin, thiol-ester bond-forming	3	0.696056	0.00636321	FBGN0041181, FBGN0041182, FBGN0041180	331	3	7043	21.2779	0.965847	0.214321	8.84913
INTERPRO	IPR019742:Alpha-2-macroglobulin, conserved site	3	0.696056	0.00636321	FBGN0041181, FBGN0041182, FBGN0041180	331	3	7043	21.2779	0.965847	0.214321	8.84913
GOTERM_CC_DIRECT	GO:0048786~presynaptic active zone	4	0.928074	0.0166718	FBGN0000635, FBGN0013997, FBGN0043362, FBGN0264607	290	12	6122	7.03678	0.950679	0.221809	18.6893
GOTERM_CC_DIRECT	GO:0045211~postsynaptic membrane	5	1.16009	0.0154027	FBGN0000635, FBGN0024980, FBGN0039927, FBGN0039928, FBGN0264607	290	21	6122	5.02627	0.937871	0.223218	17.3885
SMART	SM00020:Tryp_SPc	12	2.78422	0.00348397	FBGN0037627, FBGN0031406, FBGN0050371, FBGN0042186, FBGN0042187, FBGN0011832, FBGN0051681, FBGN0052834, FBGN0035678, FBGN0052277, FBGN0264253, FBGN0034807	196	73	3269	2.74168	0.397133	0.223555	4.05859
UP_KEYWORDS	Calcium	10	2.32019	0.0275952	FBGN0004910, FBGN0283471, FBGN0035798, FBGN0259214, FBGN0030529, FBGN0039928, FBGN0030749, FBGN0000083, FBGN0053196, FBGN0010424	415	83	7971	2.31412	0.992531	0.227203	29.0404
INTERPRO	IPR008952:Tetraspanin, EC2 domain	6	1.39211	0.00754492	FBGN0033136, FBGN0033135, FBGN0032075, FBGN0029507, FBGN0033134, FBGN0029506	331	27	7043	4.72843	0.981801	0.234398	10.41
INTERPRO	IPR018499:Tetraspanin/Peripherin	6	1.39211	0.00884044	FBGN0033136, FBGN0033135, FBGN0032075, FBGN0029507, FBGN0033134, FBGN0029506	331	28	7043	4.55956	0.990881	0.254416	12.0925
UP_KEYWORDS	LIM domain	5	1.16009	0.0333819	FBGN0026411, FBGN0011642, FBGN0085354, FBGN0050147, FBGN0261565	415	24	7971	4.00151	0.997372	0.257014	34.0473
GOTERM_CC_DIRECT	GO:0030424~axon	8	1.85615	0.0219854	FBGN0000635, FBGN0015777, FBGN0005631, FBGN0262579, FBGN0020503, FBGN0266579, FBGN0264607, FBGN0000229	290	60	6122	2.81471	0.981301	0.263687	23.9342
SMART	SM00409:IG	9	2.08817	0.00853134	FBGN0264975, FBGN0000635, FBGN0034723, FBGN0036454, FBGN0032006, FBGN0037240, FBGN0005631, FBGN0010238, FBGN0052311	196	50	3269	3.00214	0.711295	0.266984	9.67131
GOTERM_MF_DIRECT	GO:0042803~protein homodimerization activity	12	2.78422	0.00696859	FBGN0016694, FBGN0000636, FBGN0033010, FBGN0016076, FBGN0004907, FBGN0000504, FBGN0004396, FBGN0000490, FBGN0034534, FBGN0032202, FBGN0010238, FBGN0004003	263	103	5738	2.54184	0.847579	0.269129	8.77961
KEGG_PATHWAY	dme04310:Wnt signaling pathway	5	1.16009	0.0350133	FBGN0085432, FBGN0264607, FBGN0000229, FBGN0263930, FBGN0014020	50	54	2103	3.89444	0.80592	0.279562	28.5999
GOTERM_BP_DIRECT	GO:0008366~axon ensheathment	4	0.928074	0.00361506	FBGN0264975, FBGN0013997, FBGN0025631, FBGN0037240	314	7	6328	11.5159	0.966529	0.288021	5.51731
SMART	SM00587:CHK	7	1.62413	0.0119296	FBGN0051436, FBGN0039328, FBGN0039316, FBGN0051370, FBGN0051300, FBGN0051102, FBGN0045761	196	33	3269	3.53788	0.824514	0.293929	13.2791
KEGG_PATHWAY	dme04144:Endocytosis	7	1.62413	0.0445363	FBGN0260798, FBGN0001230, FBGN0015795, FBGN0010348, FBGN0086656, FBGN0039924, FBGN0014020	50	113	2103	2.60549	0.877015	0.294806	34.9888
GOTERM_BP_DIRECT	GO:0035159~regulation of tube length, open tracheal system	6	1.39211	0.00461689	FBGN0000635, FBGN0015777, FBGN0031571, FBGN0037680, FBGN0014020, FBGN0033032	314	23	6328	5.25727	0.986972	0.303525	6.99509
SMART	SM00408:IGc2	9	2.08817	0.00754212	FBGN0264975, FBGN0000635, FBGN0034723, FBGN0036454, FBGN0032006, FBGN0037240, FBGN0005631, FBGN0010238, FBGN0052311	196	49	3269	3.06341	0.66638	0.30644	8.59558
UP_KEYWORDS	Serine protease	7	1.62413	0.0436067	FBGN0031406, FBGN0042186, FBGN0042187, FBGN0011832, FBGN0051681, FBGN0004635, FBGN0264253	415	50	7971	2.68901	0.999591	0.310336	42.1087
GOTERM_CC_DIRECT	GO:0035230~cytoneme	3	0.696056	0.0293642	FBGN0264975, FBGN0000490, FBGN0023095	290	6	6122	10.5552	0.99518	0.316867	30.703
GOTERM_CC_DIRECT	GO:0005923~bicellular tight junction	3	0.696056	0.0293642	FBGN0264975, FBGN0031571, FBGN0085408	290	6	6122	10.5552	0.99518	0.316867	30.703
SMART	SM00060:FN3	7	1.62413	0.0158353	FBGN0264975, FBGN0000635, FBGN0036454, FBGN0037240, FBGN0005631, FBGN0025936, FBGN0002306	196	35	3269	3.33571	0.901184	0.320059	17.2623
INTERPRO	IPR010825:Stress-inducible humoral factor Turandot	3	0.696056	0.0123327	FBGN0028396, FBGN0031701, FBGN0044812	331	4	7043	15.9585	0.998591	0.320332	16.4827
INTERPRO	IPR008253:Marvel	3	0.696056	0.0123327	FBGN0030234, FBGN0029771, FBGN0030309	331	4	7043	15.9585	0.998591	0.320332	16.4827
INTERPRO	IPR009048:Alpha-macroglobulin, receptor-binding	3	0.696056	0.0123327	FBGN0041181, FBGN0041182, FBGN0041180	331	4	7043	15.9585	0.998591	0.320332	16.4827
INTERPRO	IPR011625:Alpha-2-macroglobulin, N-terminal 2	3	0.696056	0.0123327	FBGN0041181, FBGN0041182, FBGN0041180	331	4	7043	15.9585	0.998591	0.320332	16.4827
INTERPRO	IPR013151:Immunoglobulin	3	0.696056	0.0123327	FBGN0264975, FBGN0036454, FBGN0037240	331	4	7043	15.9585	0.998591	0.320332	16.4827
INTERPRO	IPR001599:Alpha-2-macroglobulin	3	0.696056	0.0123327	FBGN0041181, FBGN0041182, FBGN0041180	331	4	7043	15.9585	0.998591	0.320332	16.4827
INTERPRO	IPR011626:A-macroglobulin complement component	3	0.696056	0.0123327	FBGN0041181, FBGN0041182, FBGN0041180	331	4	7043	15.9585	0.998591	0.320332	16.4827
INTERPRO	IPR002890:Alpha-2-macroglobulin, N-terminal	3	0.696056	0.0123327	FBGN0041181, FBGN0041182, FBGN0041180	331	4	7043	15.9585	0.998591	0.320332	16.4827
GOTERM_BP_DIRECT	GO:0045087~innate immune response	12	2.78422	0.00457023	FBGN0283461, FBGN0032006, FBGN0014018, FBGN0040736, FBGN0067903, FBGN0262579, FBGN0011274, FBGN0028396, FBGN0031701, FBGN0035976, FBGN0044812, FBGN0035975	314	90	6328	2.68705	0.986387	0.323356	6.92675
UP_KEYWORDS	Receptor	14	3.24826	0.0521821	FBGN0028956, FBGN0032006, FBGN0039927, FBGN0260798, FBGN0025631, FBGN0085410, FBGN0032682, FBGN0025936, FBGN0014073, FBGN0002306, FBGN0003892, FBGN0013305, FBGN0029768, FBGN0034219	415	152	7971	1.76909	0.999915	0.334869	48.1607
KEGG_PATHWAY	dme04931:Insulin resistance	4	0.928074	0.0604253	FBGN0261403, FBGN0027341, FBGN0000229, FBGN0026379	50	39	2103	4.31385	0.943135	0.336073	44.518
SMART	SM01360:SM01360	3	0.696056	0.01961	FBGN0041181, FBGN0041182, FBGN0041180	196	4	3269	12.5089	0.943397	0.336511	20.952
SMART	SM01361:SM01361	3	0.696056	0.01961	FBGN0041181, FBGN0041182, FBGN0041180	196	4	3269	12.5089	0.943397	0.336511	20.952
SMART	SM01359:SM01359	3	0.696056	0.01961	FBGN0041181, FBGN0041182, FBGN0041180	196	4	3269	12.5089	0.943397	0.336511	20.952
GOTERM_MF_DIRECT	GO:0008061~chitin binding	6	1.39211	0.0122404	FBGN0026077, FBGN0260386, FBGN0020414, FBGN0020415, FBGN0036361, FBGN0020416	263	31	5738	4.22274	0.963592	0.339079	14.9421
UP_KEYWORDS	Cell junction	7	1.62413	0.0512899	FBGN0264975, FBGN0013997, FBGN0031571, FBGN0010434, FBGN0037240, FBGN0265274, FBGN0039927	415	52	7971	2.58559	0.9999	0.342179	47.5594
UP_KEYWORDS	Transducer	7	1.62413	0.0512899	FBGN0010223, FBGN0028956, FBGN0004921, FBGN0025631, FBGN0085410, FBGN0034219, FBGN0029768	415	52	7971	2.58559	0.9999	0.342179	47.5594
GOTERM_BP_DIRECT	GO:0042060~wound healing	8	1.85615	0.00971052	FBGN0243512, FBGN0020414, FBGN0011832, FBGN0004167, FBGN0001297, FBGN0000229, FBGN0020416, FBGN0014020	314	49	6328	3.29026	0.999894	0.353289	14.1798
GOTERM_BP_DIRECT	GO:0007156~homophilic cell adhesion via plasma membrane adhesion molecules	5	1.16009	0.00837259	FBGN0000635, FBGN0000636, FBGN0023095, FBGN0039928, FBGN0010238	314	17	6328	5.92731	0.999624	0.354766	12.3446
GOTERM_BP_DIRECT	GO:0007435~salivary gland morphogenesis	7	1.62413	0.00885522	FBGN0001168, FBGN0032006, FBGN0010434, FBGN0085432, FBGN0004396, FBGN0014020, FBGN0014011	314	37	6328	3.8127	0.999762	0.355393	13.0108
GOTERM_BP_DIRECT	GO:0035011~melanotic encapsulation of foreign target	6	1.39211	0.00942141	FBGN0264975, FBGN0031216, FBGN0025936, FBGN0040324, FBGN0026379, FBGN0014011	314	27	6328	4.47841	0.999861	0.358508	13.7863
GOTERM_MF_DIRECT	GO:0008092~cytoskeletal protein binding	5	1.16009	0.011536	FBGN0265082, FBGN0010434, FBGN0011747, FBGN0004167, FBGN0013733	263	20	5738	5.45437	0.955896	0.359744	14.1416
GOTERM_BP_DIRECT	GO:0035225~determination of genital disc primordium	4	0.928074	0.00805683	FBGN0000014, FBGN0000015, FBGN0003892, FBGN0004635	314	9	6328	8.95683	0.999493	0.360039	11.9062
GOTERM_BP_DIRECT	GO:0003015~heart process	4	0.928074	0.00805683	FBGN0013997, FBGN0004921, FBGN0010434, FBGN0010894	314	9	6328	8.95683	0.999493	0.360039	11.9062
GOTERM_BP_DIRECT	GO:0007155~cell adhesion	11	2.5522	0.00626735	FBGN0033504, FBGN0000635, FBGN0004921, FBGN0011642, FBGN0023095, FBGN0036101, FBGN0030749, FBGN0010348, FBGN0039924, FBGN0025879, FBGN0026379	314	81	6328	2.73681	0.997253	0.364686	9.38255
GOTERM_BP_DIRECT	GO:0007422~peripheral nervous system development	9	2.08817	0.00723279	FBGN0243512, FBGN0000014, FBGN0259938, FBGN0000575, FBGN0025936, FBGN0003892, FBGN0040324, FBGN0004635, FBGN0014020	314	58	6328	3.12717	0.998896	0.364876	10.7524
GOTERM_BP_DIRECT	GO:0007507~heart development	8	1.85615	0.00773322	FBGN0000014, FBGN0283471, FBGN0000015, FBGN0085432, FBGN0004117, FBGN0000490, FBGN0003256, FBGN0008651	314	47	6328	3.43028	0.999312	0.365629	11.4548
INTERPRO	IPR003961:Fibronectin, type III	7	1.62413	0.0158552	FBGN0264975, FBGN0000635, FBGN0036454, FBGN0037240, FBGN0005631, FBGN0025936, FBGN0002306	331	44	7043	3.38513	0.999787	0.37481	20.7034
GOTERM_MF_DIRECT	GO:0005125~cytokine activity	4	0.928074	0.0191479	FBGN0024234, FBGN0034199, FBGN0000490, FBGN0026199	263	13	5738	6.71307	0.994487	0.376741	22.435
GOTERM_BP_DIRECT	GO:0040005~chitin-based cuticle attachment to epithelium	3	0.696056	0.00707756	FBGN0250871, FBGN0053196, FBGN0020521	314	3	6328	20.1529	0.998722	0.378664	10.5334
GOTERM_BP_DIRECT	GO:0021682~nerve maturation	3	0.696056	0.00707756	FBGN0264975, FBGN0013997, FBGN0037240	314	3	6328	20.1529	0.998722	0.378664	10.5334
GOTERM_MF_DIRECT	GO:0005160~transforming growth factor beta receptor binding	3	0.696056	0.0189527	FBGN0024234, FBGN0000490, FBGN0026199	263	5	5738	13.0905	0.994184	0.402333	22.232
GOTERM_MF_DIRECT	GO:0004866~endopeptidase inhibitor activity	3	0.696056	0.0189527	FBGN0041181, FBGN0041182, FBGN0041180	263	5	5738	13.0905	0.994184	0.402333	22.232
GOTERM_BP_DIRECT	GO:0007480~imaginal disc-derived leg morphogenesis	8	1.85615	0.013335	FBGN0003345, FBGN0004893, FBGN0026411, FBGN0050456, FBGN0263930, FBGN0014020, FBGN0008651, FBGN0050115	314	52	6328	3.10044	0.999997	0.408256	18.972
GOTERM_CC_DIRECT	GO:0005856~cytoskeleton	7	1.62413	0.0437682	FBGN0265082, FBGN0010434, FBGN0011642, FBGN0260866, FBGN0013733, FBGN0085408, FBGN0014020	290	55	6122	2.68677	0.999668	0.413789	42.3485
GOTERM_BP_DIRECT	GO:0006508~proteolysis	18	4.17633	0.0131553	FBGN0032536, FBGN0031406, FBGN0050371, FBGN0042186, FBGN0042187, FBGN0011832, FBGN0051681, FBGN0035678, FBGN0027570, FBGN0052277, FBGN0037627, FBGN0051445, FBGN0032304, FBGN0052834, FBGN0003892, FBGN0052369, FBGN0264253, FBGN0034807	314	191	6328	1.89922	0.999996	0.417292	18.7405
SMART	SM00033:CH	5	1.16009	0.0330051	FBGN0028371, FBGN0035499, FBGN0004167, FBGN0013733, FBGN0085446	196	21	3269	3.97109	0.9923	0.417672	32.863
GOTERM_BP_DIRECT	GO:0007475~apposition of dorsal and ventral imaginal disc-derived wing surfaces	5	1.16009	0.0126132	FBGN0250871, FBGN0000244, FBGN0013733, FBGN0053196, FBGN0020521	314	19	6328	5.30339	0.999993	0.417952	18.0382
GOTERM_BP_DIRECT	GO:0072499~photoreceptor cell axon guidance	5	1.16009	0.0126132	FBGN0264975, FBGN0000635, FBGN0028371, FBGN0005631, FBGN0023095	314	19	6328	5.30339	0.999993	0.417952	18.0382
GOTERM_BP_DIRECT	GO:0006814~sodium ion transport	4	0.928074	0.0147019	FBGN0015777, FBGN0040297, FBGN0026787, FBGN0024315	314	11	6328	7.32831	0.999999	0.426335	20.7134
INTERPRO	IPR017948:Transforming growth factor beta, conserved site	3	0.696056	0.0199212	FBGN0024234, FBGN0000490, FBGN0026199	331	5	7043	12.7668	0.999976	0.428932	25.3281
INTERPRO	IPR015615:Transforming growth factor-beta-related	3	0.696056	0.0199212	FBGN0024234, FBGN0000490, FBGN0026199	331	5	7043	12.7668	0.999976	0.428932	25.3281
INTERPRO	IPR001839:Transforming growth factor-beta, C-terminal	3	0.696056	0.0199212	FBGN0024234, FBGN0000490, FBGN0026199	331	5	7043	12.7668	0.999976	0.428932	25.3281
GOTERM_MF_DIRECT	GO:0005089~Rho guanyl-nucleotide exchange factor activity	5	1.16009	0.0189428	FBGN0034194, FBGN0031216, FBGN0265082, FBGN0050456, FBGN0050115	263	23	5738	4.74293	0.994169	0.435384	22.2216
GOTERM_MF_DIRECT	GO:0046982~protein heterodimerization activity	10	2.32019	0.0253459	FBGN0000575, FBGN0000370, FBGN0016076, FBGN0004907, FBGN0000490, FBGN0034534, FBGN0014396, FBGN0001297, FBGN0032202, FBGN0261703	263	93	5738	2.34597	0.998998	0.437574	28.6343
UP_KEYWORDS	Growth factor	3	0.696056	0.0760486	FBGN0024234, FBGN0000490, FBGN0026199	415	9	7971	6.40241	0.999999	0.438274	62.0794
SMART	SM00204:TGFB	3	0.696056	0.0314088	FBGN0024234, FBGN0000490, FBGN0026199	196	5	3269	10.0071	0.990219	0.439215	31.5355
GOTERM_MF_DIRECT	GO:0008084~imaginal disc growth factor receptor binding	3	0.696056	0.0275798	FBGN0020414, FBGN0020415, FBGN0020416	263	6	5738	10.9087	0.99946	0.439377	30.754
INTERPRO	IPR001715:Calponin homology domain	5	1.16009	0.0239275	FBGN0028371, FBGN0035499, FBGN0004167, FBGN0013733, FBGN0085446	331	24	7043	4.43291	0.999997	0.473011	29.6381
INTERPRO	IPR001781:Zinc finger, LIM-type	5	1.16009	0.0239275	FBGN0026411, FBGN0011642, FBGN0085354, FBGN0050147, FBGN0261565	331	24	7043	4.43291	0.999997	0.473011	29.6381
GOTERM_MF_DIRECT	GO:0001078~transcriptional repressor activity, RNA polymerase II core promoter proximal region sequence-specific binding	4	0.928074	0.0398121	FBGN0001168, FBGN0016076, FBGN0035625, FBGN0000504	263	17	5738	5.13353	0.999982	0.517399	41.3659
GOTERM_MF_DIRECT	GO:0005544~calcium-dependent phospholipid binding	3	0.696056	0.0374626	FBGN0266758, FBGN0030749, FBGN0000083	263	7	5738	9.35035	0.999965	0.519845	39.4523
COG_ONTOLOGY	Secondary metabolites biosynthesis, transport, and catabolism	6	1.39211	0.0485666	FBGN0038007, FBGN0038680, FBGN0015714, FBGN0033982, FBGN0015040, FBGN0033978	32	61	919	2.8248	0.526112	0.526112	29.2586
GOTERM_BP_DIRECT	GO:0008045~motor neuron axon guidance	7	1.62413	0.0223225	FBGN0264975, FBGN0000635, FBGN0020294, FBGN0005631, FBGN0023095, FBGN0263930, FBGN0014020	314	45	6328	3.13489	1	0.530589	29.7967
GOTERM_BP_DIRECT	GO:0035220~wing disc development	9	2.08817	0.0231218	FBGN0003345, FBGN0004893, FBGN0050069, FBGN0039316, FBGN0004858, FBGN0261403, FBGN0001297, FBGN0263930, FBGN0262160	314	71	6328	2.55459	1	0.530766	30.6908
GOTERM_BP_DIRECT	GO:0045944~positive regulation of transcription from RNA polymerase II promoter	15	3.48028	0.0207559	FBGN0000014, FBGN0003345, FBGN0000015, FBGN0000370, FBGN0004893, FBGN0000567, FBGN0014018, FBGN0085432, FBGN0000504, FBGN0004396, FBGN0034534, FBGN0001297, FBGN0011274, FBGN0035542, FBGN0261703	314	155	6328	1.95028	1	0.530783	28.013
SMART	SM00132:LIM	5	1.16009	0.0510203	FBGN0026411, FBGN0011642, FBGN0085354, FBGN0050147, FBGN0261565	196	24	3269	3.4747	0.999496	0.532022	46.2964
UP_SEQ_FEATURE	domain:Ig-like C2-type 5	3	0.696056	0.0201003	FBGN0264975, FBGN0000635, FBGN0037240	104	5	2182	12.5885	0.997783	0.53419	23.7745
GOTERM_BP_DIRECT	GO:0035263~genital disc sexually dimorphic development	3	0.696056	0.02208	FBGN0000015, FBGN0000504, FBGN0000490	314	5	6328	12.0917	1	0.539606	29.5234
GOTERM_BP_DIRECT	GO:0035074~pupation	3	0.696056	0.02208	FBGN0000370, FBGN0039226, FBGN0035625	314	5	6328	12.0917	1	0.539606	29.5234
GOTERM_BP_DIRECT	GO:0009987~cellular process	3	0.696056	0.02208	FBGN0261113, FBGN0016076, FBGN0026379	314	5	6328	12.0917	1	0.539606	29.5234
GOTERM_BP_DIRECT	GO:0060395~SMAD protein signal transduction	3	0.696056	0.02208	FBGN0024234, FBGN0000490, FBGN0026199	314	5	6328	12.0917	1	0.539606	29.5234
SMART	SM00241:ZP	3	0.696056	0.0609521	FBGN0037796, FBGN0053196, FBGN0020521	196	7	3269	7.14796	0.99989	0.563509	52.602
GOTERM_CC_DIRECT	GO:0005623~cell	5	1.16009	0.074245	FBGN0001186, FBGN0034199, FBGN0000244, FBGN0058178, FBGN0040297	290	34	6122	3.10446	0.999999	0.578134	61.301
GOTERM_MF_DIRECT	GO:0005506~iron ion binding	9	2.08817	0.0550321	FBGN0038007, FBGN0052068, FBGN0038680, FBGN0015714, FBGN0033982, FBGN0038130, FBGN0038349, FBGN0015040, FBGN0033978	263	91	5738	2.15777	1	0.6139	52.4702
SMART	SM00636:Glyco_18	3	0.696056	0.0781486	FBGN0020414, FBGN0020415, FBGN0020416	196	8	3269	6.25446	0.999992	0.625901	61.94
UP_SEQ_FEATURE	domain:Ig-like C2-type 4	3	0.696056	0.0292294	FBGN0264975, FBGN0000635, FBGN0037240	104	6	2182	10.4904	0.999868	0.629215	32.7408
GOTERM_BP_DIRECT	GO:0007552~metamorphosis	5	1.16009	0.0326423	FBGN0035089, FBGN0000370, FBGN0266450, FBGN0003256, FBGN0026379	314	25	6328	4.03057	1	0.633653	40.5519
GOTERM_BP_DIRECT	GO:0007476~imaginal disc-derived wing morphogenesis	16	3.7123	0.0338354	FBGN0010620, FBGN0261113, FBGN0000490, FBGN0260866, FBGN0023095, FBGN0032230, FBGN0004635, FBGN0000575, FBGN0003345, FBGN0000636, FBGN0000489, FBGN0085432, FBGN0000244, FBGN0003892, FBGN0003256, FBGN0263930	314	181	6328	1.78147	1	0.635405	41.6905
INTERPRO	IPR008930:Terpenoid cyclases/protein prenyltransferase alpha-alpha toroid	3	0.696056	0.0393111	FBGN0041181, FBGN0041182, FBGN0041180	331	7	7043	9.11912	1	0.635874	44.1276
GOTERM_BP_DIRECT	GO:0040014~regulation of multicellular organism growth	4	0.928074	0.0350288	FBGN0026077, FBGN0263930, FBGN0004003, FBGN0026379	314	15	6328	5.3741	1	0.637062	42.809
GOTERM_BP_DIRECT	GO:0048636~positive regulation of muscle organ development	3	0.696056	0.0320481	FBGN0000014, FBGN0024234, FBGN0000490	314	6	6328	10.0764	1	0.638844	39.977
GOTERM_BP_DIRECT	GO:0035224~genital disc anterior/posterior pattern formation	3	0.696056	0.0320481	FBGN0000014, FBGN0000015, FBGN0000490	314	6	6328	10.0764	1	0.638844	39.977
GOTERM_BP_DIRECT	GO:0010862~positive regulation of pathway-restricted SMAD protein phosphorylation	3	0.696056	0.0320481	FBGN0024234, FBGN0000490, FBGN0026199	314	6	6328	10.0764	1	0.638844	39.977
GOTERM_BP_DIRECT	GO:0007254~JNK cascade	5	1.16009	0.037124	FBGN0243512, FBGN0001297, FBGN0000229, FBGN0014020, FBGN0014011	314	26	6328	3.87555	1	0.647844	44.7243
UP_SEQ_FEATURE	splice variant	33	7.65661	0.0344695	FBGN0264975, FBGN0283471, FBGN0262579, FBGN0264607, FBGN0000635, FBGN0000636, FBGN0025631, FBGN0085432, FBGN0004907, FBGN0004117, FBGN0014396, FBGN0001297, FBGN0003748, FBGN0010238, FBGN0003256, FBGN0000083, FBGN0024315, FBGN0014018, FBGN0010434, FBGN0000504, FBGN0020503, FBGN0266450, FBGN0263995, FBGN0261555, FBGN0000014, FBGN0000015, FBGN0015777, FBGN0000489, FBGN0004858, FBGN0002306, FBGN00854…	104	503	2182	1.37647	0.999974	0.652098	37.436
GOTERM_CC_DIRECT	GO:0005622~intracellular	16	3.7123	0.0959463	FBGN0051826, FBGN0032006, FBGN0265082, FBGN0034312, FBGN0000490, FBGN0002566, FBGN0032210, FBGN0036289, FBGN0010348, FBGN0029863, FBGN0031216, FBGN0039889, FBGN0000229, FBGN0003206, FBGN0003256, FBGN0014011	290	220	6122	1.5353	1	0.654259	71.0982
GOTERM_MF_DIRECT	GO:0005509~calcium ion binding	11	2.5522	0.0755014	FBGN0264975, FBGN0004910, FBGN0035798, FBGN0030529, FBGN0038088, FBGN0039928, FBGN0030749, FBGN0013733, FBGN0000083, FBGN0053196, FBGN0010424	263	131	5738	1.832	1	0.670918	64.3558
GOTERM_BP_DIRECT	GO:0008063~Toll signaling pathway	5	1.16009	0.0419418	FBGN0014018, FBGN0040736, FBGN0002930, FBGN0011274, FBGN0004003	314	27	6328	3.73201	1	0.672542	48.9029
INTERPRO	IPR011993:Pleckstrin homology-like domain	12	2.78422	0.0513968	FBGN0260798, FBGN0034194, FBGN0265082, FBGN0010434, FBGN0043362, FBGN0260866, FBGN0004167, FBGN0000244, FBGN0050456, FBGN0036318, FBGN0261555, FBGN0050115	331	135	7043	1.89137	1	0.672577	53.5064
GOTERM_BP_DIRECT	GO:0098542~defense response to other organism	3	0.696056	0.0434213	FBGN0041181, FBGN0067903, FBGN0013272	314	7	6328	8.63694	1	0.675478	50.1255
GOTERM_BP_DIRECT	GO:0030707~ovarian follicle cell development	9	2.08817	0.0459065	FBGN0243512, FBGN0000636, FBGN0024234, FBGN0000490, FBGN0004167, FBGN0000229, FBGN0003892, FBGN0004635, FBGN0026379	314	81	6328	2.23921	1	0.67705	52.1179
SMART	SM00214:VWC	3	0.696056	0.0966386	FBGN0002306, FBGN0037012, FBGN0037016	196	9	3269	5.55952	1	0.678126	70.0769
SMART	SM00150:SPEC	3	0.696056	0.0966386	FBGN0004167, FBGN0052311, FBGN0013733	196	9	3269	5.55952	1	0.678126	70.0769
GOTERM_BP_DIRECT	GO:0030036~actin cytoskeleton organization	6	1.39211	0.0415737	FBGN0010620, FBGN0243512, FBGN0032006, FBGN0013733, FBGN0014020, FBGN0026379	314	39	6328	3.10044	1	0.67954	48.5944
GOTERM_MF_DIRECT	GO:0046983~protein dimerization activity	5	1.16009	0.0734045	FBGN0001168, FBGN0259938, FBGN0261113, FBGN0032202, FBGN0035976	263	35	5738	3.11678	1	0.679969	63.2787
GOTERM_BP_DIRECT	GO:0008586~imaginal disc-derived wing vein morphogenesis	6	1.39211	0.0456673	FBGN0000575, FBGN0024234, FBGN0000490, FBGN0003256, FBGN0263930, FBGN0004635	314	40	6328	3.02293	1	0.684568	51.9294
INTERPRO	IPR011009:Protein kinase-like domain	17	3.94432	0.0510655	FBGN0032006, FBGN0039328, FBGN0027101, FBGN0264607, FBGN0086909, FBGN0051102, FBGN0051436, FBGN0260798, FBGN0000489, FBGN0039316, FBGN0051370, FBGN0051300, FBGN0025936, FBGN0014073, FBGN0000229, FBGN0003256, FBGN0045761	331	219	7043	1.65171	1	0.685045	53.2701
GOTERM_MF_DIRECT	GO:0005515~protein binding	33	7.65661	0.0713986	FBGN0000490, FBGN0011274, FBGN0004003, FBGN0000635, FBGN0085432, FBGN0004907, FBGN0004167, FBGN0014396, FBGN0001297, FBGN0036581, FBGN0000229, FBGN0052311, FBGN0263930, FBGN0000083, FBGN0014020, FBGN0001168, FBGN0032006, FBGN0014018, FBGN0005631, FBGN0011642, FBGN0000504, FBGN0020503, FBGN0013733, FBGN0023214, FBGN0041096, FBGN0000489, FBGN0035499, FBGN0004858, FBGN0024807, FBGN0003892, FBGN00032…	263	539	5738	1.33576	1	0.690296	62.2202
INTERPRO	IPR018253:DnaJ domain, conserved site	4	0.928074	0.056614	FBGN0058178, FBGN0052640, FBGN0052641, FBGN0031322	331	19	7043	4.47957	1	0.694489	57.083
INTERPRO	IPR011583:Chitinase II	3	0.696056	0.0508192	FBGN0020414, FBGN0020415, FBGN0020416	331	8	7043	7.97923	1	0.698681	53.0938
INTERPRO	IPR001223:Glycoside hydrolase, family 18, catalytic domain	3	0.696056	0.0508192	FBGN0020414, FBGN0020415, FBGN0020416	331	8	7043	7.97923	1	0.698681	53.0938
GOTERM_BP_DIRECT	GO:0046843~dorsal appendage formation	6	1.39211	0.049993	FBGN0243512, FBGN0000575, FBGN0000490, FBGN0038826, FBGN0000229, FBGN0014011	314	41	6328	2.9492	1	0.699604	55.2327
INTERPRO	IPR016186:C-type lectin-like	4	0.928074	0.0493306	FBGN0031571, FBGN0037240, FBGN0261258, FBGN0031918	331	18	7043	4.72843	1	0.703715	52.0147
GOTERM_MF_DIRECT	GO:0001191~transcriptional repressor activity, RNA polymerase II transcription factor binding	2	0.464037	0.0892437	FBGN0000575, FBGN0023214	263	2	5738	21.8175	1	0.715581	70.7234
GOTERM_MF_DIRECT	GO:0004705~JUN kinase activity	2	0.464037	0.0892437	FBGN0000229, FBGN0003256	263	2	5738	21.8175	1	0.715581	70.7234
INTERPRO	IPR018159:Spectrin/alpha-actinin	3	0.696056	0.063358	FBGN0004167, FBGN0052311, FBGN0013733	331	9	7043	7.09265	1	0.722634	61.3273
INTERPRO	IPR001589:Actinin-type, actin-binding, conserved site	3	0.696056	0.063358	FBGN0028371, FBGN0004167, FBGN0013733	331	9	7043	7.09265	1	0.722634	61.3273
INTERPRO	IPR002017:Spectrin repeat	3	0.696056	0.063358	FBGN0004167, FBGN0052311, FBGN0013733	331	9	7043	7.09265	1	0.722634	61.3273
GOTERM_BP_DIRECT	GO:0043408~regulation of MAPK cascade	3	0.696056	0.0560371	FBGN0024234, FBGN0000490, FBGN0026199	314	8	6328	7.55732	1	0.732689	59.4936
GOTERM_BP_DIRECT	GO:0006952~defense response	5	1.16009	0.0584084	FBGN0034638, FBGN0283461, FBGN0040736, FBGN0067903, FBGN0011274	314	30	6328	3.35881	1	0.739226	61.0591
INTERPRO	IPR005225:Small GTP-binding protein domain	7	1.62413	0.0690216	FBGN0039889, FBGN0003206, FBGN0015795, FBGN0010348, FBGN0014020, FBGN0014011, FBGN0015791	331	62	7043	2.40235	1	0.741071	64.5862
INTERPRO	IPR016187:C-type lectin fold	4	0.928074	0.0725973	FBGN0031571, FBGN0037240, FBGN0261258, FBGN0031918	331	21	7043	4.05294	1	0.747111	66.51
INTERPRO	IPR000219:Dbl homology (DH) domain	4	0.928074	0.0725973	FBGN0034194, FBGN0265082, FBGN0050456, FBGN0050115	331	21	7043	4.05294	1	0.747111	66.51
INTERPRO	IPR001007:von Willebrand factor, type C	3	0.696056	0.0768065	FBGN0002306, FBGN0037012, FBGN0037016	331	10	7043	6.38338	1	0.75566	68.6498
INTERPRO	IPR018980:FERM, C-terminal PH-like domain	3	0.696056	0.0768065	FBGN0265082, FBGN0010434, FBGN0260866	331	10	7043	6.38338	1	0.75566	68.6498
INTERPRO	IPR020479:Homeodomain, metazoa	3	0.696056	0.0768065	FBGN0000014, FBGN0000015, FBGN0008651	331	10	7043	6.38338	1	0.75566	68.6498
INTERPRO	IPR018979:FERM, N-terminal	3	0.696056	0.0768065	FBGN0265082, FBGN0010434, FBGN0260866	331	10	7043	6.38338	1	0.75566	68.6498
UP_SEQ_FEATURE	domain:Ig-like C2-type 3	3	0.696056	0.0512976	FBGN0264975, FBGN0000635, FBGN0037240	104	8	2182	7.86779	1	0.763303	50.5425
GOTERM_BP_DIRECT	GO:0007431~salivary gland development	4	0.928074	0.0645609	FBGN0001168, FBGN0000015, FBGN0004396, FBGN0004635	314	19	6328	4.24271	1	0.766797	64.8609
GOTERM_BP_DIRECT	GO:0035147~branch fusion, open tracheal system	4	0.928074	0.0645609	FBGN0000490, FBGN0023095, FBGN0013733, FBGN0014020	314	19	6328	4.24271	1	0.766797	64.8609
GOTERM_BP_DIRECT	GO:0061327~anterior Malpighian tubule development	3	0.696056	0.0697458	FBGN0041096, FBGN0032006, FBGN0000490	314	9	6328	6.71762	1	0.785887	67.7921
GOTERM_BP_DIRECT	GO:0034605~cellular response to heat	3	0.696056	0.0697458	FBGN0028396, FBGN0031701, FBGN0044812	314	9	6328	6.71762	1	0.785887	67.7921
GOTERM_BP_DIRECT	GO:0006955~immune response	6	1.39211	0.0751082	FBGN0014018, FBGN0002930, FBGN0011274, FBGN0033875, FBGN0035976, FBGN0035975	314	46	6328	2.62863	1	0.796507	70.5817
GOTERM_BP_DIRECT	GO:0007474~imaginal disc-derived wing vein specification	6	1.39211	0.0751082	FBGN0260798, FBGN0024234, FBGN0000490, FBGN0003256, FBGN0004635, FBGN0050115	314	46	6328	2.62863	1	0.796507	70.5817
GOTERM_BP_DIRECT	GO:0032504~multicellular organism reproduction	8	1.85615	0.0806741	FBGN0034638, FBGN0053126, FBGN0032495, FBGN0041180, FBGN0004629, FBGN0033942, FBGN0034162, FBGN0034512	314	76	6328	2.12135	1	0.800151	73.2368
GOTERM_BP_DIRECT	GO:0008039~synaptic target recognition	4	0.928074	0.082487	FBGN0031213, FBGN0013997, FBGN0000636, FBGN0250871	314	21	6328	3.83864	1	0.801114	74.052
GOTERM_BP_DIRECT	GO:0016319~mushroom body development	7	1.62413	0.074645	FBGN0264975, FBGN0000635, FBGN0025936, FBGN0000229, FBGN0026199, FBGN0013733, FBGN0040324	314	60	6328	2.35117	1	0.80152	70.3499
GOTERM_BP_DIRECT	GO:0051489~regulation of filopodium assembly	3	0.696056	0.084409	FBGN0010223, FBGN0264607, FBGN0014020	314	10	6328	6.04586	1	0.802481	74.8908
GOTERM_BP_DIRECT	GO:0034334~adherens junction maintenance	3	0.696056	0.084409	FBGN0003256, FBGN0014020, FBGN0014011	314	10	6328	6.04586	1	0.802481	74.8908
GOTERM_BP_DIRECT	GO:0035158~regulation of tube diameter, open tracheal system	3	0.696056	0.084409	FBGN0000635, FBGN0015777, FBGN0000490	314	10	6328	6.04586	1	0.802481	74.8908
GOTERM_BP_DIRECT	GO:0035215~genital disc development	3	0.696056	0.084409	FBGN0000015, FBGN0000504, FBGN0000490	314	10	6328	6.04586	1	0.802481	74.8908
GOTERM_BP_DIRECT	GO:0008360~regulation of cell shape	9	2.08817	0.0799599	FBGN0243512, FBGN0000635, FBGN0004921, FBGN0032006, FBGN0000490, FBGN0030749, FBGN0010348, FBGN0039924, FBGN0026379	314	91	6328	1.99314	1	0.803789	72.9091
INTERPRO	IPR001071:Cellular retinaldehyde binding/alpha-tocopherol transport	3	0.696056	0.0910524	FBGN0051826, FBGN0036289, FBGN0029863	331	11	7043	5.80308	1	0.803896	74.9844
GOTERM_BP_DIRECT	GO:0007186~G-protein coupled receptor signaling pathway	7	1.62413	0.0795293	FBGN0010223, FBGN0028956, FBGN0004921, FBGN0025631, FBGN0085410, FBGN0034219, FBGN0029768	314	61	6328	2.31262	1	0.808693	72.7097
UP_SEQ_FEATURE	lipid moiety-binding region:S-geranylgeranyl cysteine	3	0.696056	0.0639624	FBGN0004921, FBGN0014020, FBGN0014011	104	9	2182	6.99359	1	0.80948	58.6765
INTERPRO	IPR017970:Homeobox, conserved site	4	0.928074	0.0998372	FBGN0000014, FBGN0000015, FBGN0026411, FBGN0008651	331	24	7043	3.54632	1	0.82426	78.2734
UP_SEQ_FEATURE	short sequence motif:Nuclear localization signal	5	1.16009	0.0732474	FBGN0014018, FBGN0085432, FBGN0014396, FBGN0263995, FBGN0011274	104	34	2182	3.08541	1	0.828176	63.833
GOTERM_BP_DIRECT	GO:0048071~sex-specific pigmentation	2	0.464037	0.0964863	FBGN0000015, FBGN0000504	314	2	6328	20.1529	1	0.839627	79.6079
GOTERM_BP_DIRECT	GO:0035208~positive regulation of hemocyte proliferation	2	0.464037	0.0964863	FBGN0010223, FBGN0030309	314	2	6328	20.1529	1	0.839627	79.6079
GOTERM_BP_DIRECT	GO:2000826~regulation of heart morphogenesis	2	0.464037	0.0964863	FBGN0003345, FBGN0003256	314	2	6328	20.1529	1	0.839627	79.6079
GOTERM_BP_DIRECT	GO:0005991~trehalose metabolic process	2	0.464037	0.0964863	FBGN0000370, FBGN0003748	314	2	6328	20.1529	1	0.839627	79.6079
GOTERM_BP_DIRECT	GO:0010797~regulation of multivesicular body size involved in endosome transport	2	0.464037	0.0964863	FBGN0004167, FBGN0000083	314	2	6328	20.1529	1	0.839627	79.6079
GOTERM_BP_DIRECT	GO:0007436~larval salivary gland morphogenesis	3	0.696056	0.0998995	FBGN0023095, FBGN0004635, FBGN0026379	314	11	6328	5.49624	1	0.844748	80.7822
GOTERM_BP_DIRECT	GO:0045570~regulation of imaginal disc growth	3	0.696056	0.0998995	FBGN0000504, FBGN0000490, FBGN0263930	314	11	6328	5.49624	1	0.844748	80.7822
UP_SEQ_FEATURE	domain:Ig-like V-type	2	0.464037	0.0922012	FBGN0000636, FBGN0010238	104	2	2182	20.9808	1	0.856454	72.5634
UP_SEQ_FEATURE	domain:Ig-like C2-type 6	2	0.464037	0.0922012	FBGN0264975, FBGN0037240	104	2	2182	20.9808	1	0.856454	72.5634
UP_SEQ_FEATURE	lipid moiety-binding region:GPI-anchor amidated alanine	2	0.464037	0.0922012	FBGN0037240, FBGN0010238	104	2	2182	20.9808	1	0.856454	72.5634
UP_SEQ_FEATURE	domain:Fibronectin type-III 2	3	0.696056	0.0919414	FBGN0264975, FBGN0000635, FBGN0037240	104	11	2182	5.72203	1	0.874267	72.4583
UP_SEQ_FEATURE	short sequence motif:Effector region	3	0.696056	0.0919414	FBGN0003206, FBGN0014020, FBGN0014011	104	11	2182	5.72203	1	0.874267	72.4583
UP_SEQ_FEATURE	domain:Fibronectin type-III 1	3	0.696056	0.0919414	FBGN0264975, FBGN0000635, FBGN0037240	104	11	2182	5.72203	1	0.874267	72.4583

## Sheet: Epithelial
Category	Term	Count	%	PValue	Genes	List Total	Pop Hits	Pop Total	Fold Enrichment	Bonferroni	Benjamini	FDR
UP_KEYWORDS	Ion channel	14	5.40541	4.8441e-10	FBGN0051201, FBGN0085425, FBGN0026255, FBGN0262593, FBGN0046113, FBGN0060296, FBGN0011286, FBGN0264908, FBGN0001991, FBGN0033257, FBGN0036727, FBGN0028422, FBGN0004646, FBGN0035192	246	45	7971	10.0808	7.45992e-08	7.45992e-08	5.81099e-07
UP_KEYWORDS	Ion transport	17	6.56371	4.51123e-08	FBGN0051201, FBGN0262593, FBGN0026255, FBGN0011286, FBGN0264908, FBGN0265262, FBGN0001991, FBGN0033257, FBGN0036727, FBGN0004646, FBGN0035192, FBGN0060296, FBGN0046113, FBGN0085425, FBGN0263598, FBGN0263006, FBGN0028422	246	99	7971	5.56406	6.94727e-06	3.47364e-06	5.41167e-05
UP_KEYWORDS	Signal	69	26.6409	8.37992e-08	FBGN0051201, FBGN0043534, FBGN0038809, FBGN0033515, FBGN0032612, FBGN0010389, FBGN0032900, FBGN0028523, FBGN0001137, FBGN0250835, FBGN0000278, FBGN0000279, FBGN0003984, FBGN0002526, FBGN0028622, FBGN0046763, FBGN0038181, FBGN0035985, FBGN0040322, FBGN0030334, FBGN0262572, FBGN0011822, FBGN0028988, FBGN0032666, FBGN0024366, FBGN0262057, FBGN0011828, FBGN0031548, FBGN0051217, FBGN0038072, FBGN00309…	246	1182	7971	1.89151	1.2905e-05	4.30168e-06	0.000100526
GOTERM_CC_DIRECT	GO:0030018~Z disc	10	3.861	1.28702e-07	FBGN0035917, FBGN0265991, FBGN0086906, FBGN0011286, FBGN0014863, FBGN0011296, FBGN0259209, FBGN0265487, FBGN0005666, FBGN0265356	171	32	6122	11.1879	1.73747e-05	1.73747e-05	0.000150887
GOTERM_BP_DIRECT	GO:0030239~myofibril assembly	8	3.0888	4.04398e-08	FBGN0002773, FBGN0035917, FBGN0265991, FBGN0264695, FBGN0003149, FBGN0001250, FBGN0082582, FBGN0265356	182	14	6328	19.8681	2.24034e-05	2.24034e-05	5.90743e-05
INTERPRO	IPR003598:Immunoglobulin subtype 2	11	4.2471	7.76806e-07	FBGN0262509, FBGN0003984, FBGN0035410, FBGN0086906, FBGN0010389, FBGN0053519, FBGN0016061, FBGN0086604, FBGN0033159, FBGN0011828, FBGN0005666	199	49	7043	7.94513	0.000295919	0.000147971	0.00107581
GOTERM_BP_DIRECT	GO:0045214~sarcomere organization	9	3.4749	7.31127e-07	FBGN0086906, FBGN0264695, FBGN0053519, FBGN0086368, FBGN0014863, FBGN0011296, FBGN0001250, FBGN0264491, FBGN0005666	182	28	6328	11.1758	0.000404963	0.000202502	0.00106802
INTERPRO	IPR007110:Immunoglobulin-like domain	12	4.6332	5.6457e-07	FBGN0262509, FBGN0003984, FBGN0035410, FBGN0086906, FBGN0010389, FBGN0053519, FBGN0016061, FBGN0086604, FBGN0033159, FBGN0011828, FBGN0005666, FBGN0034920	199	59	7043	7.19836	0.000215078	0.000215078	0.000781884
INTERPRO	IPR013783:Immunoglobulin-like fold	14	5.40541	2.12754e-06	FBGN0262509, FBGN0035410, FBGN0053519, FBGN0010389, FBGN0086604, FBGN0033159, FBGN0011828, FBGN0034920, FBGN0034588, FBGN0003984, FBGN0086906, FBGN0016061, FBGN0005666, FBGN0039500	199	95	7043	5.21566	0.000810265	0.000270161	0.00294644
INTERPRO	IPR003599:Immunoglobulin subtype	10	3.861	8.44238e-06	FBGN0262509, FBGN0035410, FBGN0086906, FBGN0010389, FBGN0053519, FBGN0016061, FBGN0086604, FBGN0033159, FBGN0011828, FBGN0005666	199	50	7043	7.07839	0.00321139	0.000803817	0.0116914
GOTERM_BP_DIRECT	GO:0007498~mesoderm development	10	3.861	5.60312e-06	FBGN0035917, FBGN0033649, FBGN0002526, FBGN0086906, FBGN0003149, FBGN0040505, FBGN0264489, FBGN0014380, FBGN0264491, FBGN0005666	182	47	6328	7.39771	0.00309932	0.00103418	0.0081847
SMART	SM00408:IGc2	11	4.2471	1.15936e-05	FBGN0262509, FBGN0003984, FBGN0035410, FBGN0086906, FBGN0010389, FBGN0053519, FBGN0016061, FBGN0086604, FBGN0033159, FBGN0011828, FBGN0005666	127	49	3269	5.7784	0.0012166	0.0012166	0.0129855
SMART	SM00409:IG	10	3.861	9.26187e-05	FBGN0262509, FBGN0035410, FBGN0086906, FBGN0010389, FBGN0053519, FBGN0016061, FBGN0086604, FBGN0033159, FBGN0011828, FBGN0005666	127	50	3269	5.14803	0.00967827	0.0048509	0.103695
UP_KEYWORDS	Immunoglobulin domain	7	2.7027	0.000136371	FBGN0262509, FBGN0003984, FBGN0086906, FBGN0010389, FBGN0016061, FBGN0086604, FBGN0011828	246	27	7971	8.40063	0.0207836	0.00523689	0.163468
GOTERM_BP_DIRECT	GO:0070588~calcium ion transmembrane transport	5	1.9305	4.14361e-05	FBGN0060296, FBGN0011286, FBGN0001991, FBGN0259822, FBGN0261999	182	8	6328	21.7308	0.0226946	0.00572258	0.0605126
UP_KEYWORDS	Calcium	11	4.2471	0.000211944	FBGN0051999, FBGN0002773, FBGN0083228, FBGN0011286, FBGN0265595, FBGN0001991, FBGN0036926, FBGN0263006, FBGN0011828, FBGN0012051, FBGN0265959	246	83	7971	4.2943	0.0321158	0.00650731	0.253952
UP_KEYWORDS	Secreted	14	5.40541	0.000286905	FBGN0003984, FBGN0267348, FBGN0002526, FBGN0032612, FBGN0033483, FBGN0028988, FBGN0039914, FBGN0262057, FBGN0030251, FBGN0011828, FBGN0000278, FBGN0000279, FBGN0040322, FBGN0051217	246	137	7971	3.3112	0.0432275	0.00733788	0.343629
UP_KEYWORDS	Ligand-gated ion channel	5	1.9305	0.000500234	FBGN0051201, FBGN0046113, FBGN0026255, FBGN0011286, FBGN0028422	246	13	7971	12.4625	0.0741613	0.0109475	0.598433
INTERPRO	IPR013098:Immunoglobulin I-set	7	2.7027	0.000187285	FBGN0003984, FBGN0035410, FBGN0086906, FBGN0053519, FBGN0033159, FBGN0011828, FBGN0005666	199	31	7043	7.99173	0.0688754	0.0141711	0.259063
INTERPRO	IPR006629:LPS-induced tumor necrosis factor alpha factor	5	1.9305	0.000251265	FBGN0050196, FBGN0263031, FBGN0050195, FBGN0085474, FBGN0085475	199	12	7043	14.7466	0.0913036	0.0158307	0.347423
GOTERM_BP_DIRECT	GO:0006816~calcium ion transport	6	2.3166	0.000152015	FBGN0051201, FBGN0046113, FBGN0060296, FBGN0011286, FBGN0001991, FBGN0028422	182	19	6328	10.9798	0.0807734	0.0167035	0.221833
UP_KEYWORDS	Disulfide bond	22	8.49421	0.000881061	FBGN0262509, FBGN0043534, FBGN0010389, FBGN0001137, FBGN0086604, FBGN0001250, FBGN0036287, FBGN0011828, FBGN0036727, FBGN0051217, FBGN0051999, FBGN0003984, FBGN0267348, FBGN0002526, FBGN0086906, FBGN0016061, FBGN0039914, FBGN0003149, FBGN0260660, FBGN0260458, FBGN0030941, FBGN0261260	246	322	7971	2.21383	0.126933	0.0168247	1.05182
UP_KEYWORDS	Synapse	6	2.3166	0.00144983	FBGN0051201, FBGN0046113, FBGN0026255, FBGN0002526, FBGN0036727, FBGN0028422	246	28	7971	6.94338	0.200234	0.0245206	1.72542
GOTERM_MF_DIRECT	GO:0042826~histone deacetylase binding	5	1.9305	0.000457422	FBGN0033061, FBGN0030257, FBGN0030102, FBGN0036282, FBGN0033633	160	14	5738	12.808	0.0849351	0.0849351	0.568977
GOTERM_CC_DIRECT	GO:0008328~ionotropic glutamate receptor complex	4	1.5444	0.000395637	FBGN0051201, FBGN0046113, FBGN0265416, FBGN0028422	171	6	6122	23.8674	0.0520197	0.0263572	0.46285
GOTERM_MF_DIRECT	GO:0005234~extracellular-glutamate-gated ion channel activity	4	1.5444	0.000673331	FBGN0051201, FBGN0046113, FBGN0026255, FBGN0028422	160	7	5738	20.4929	0.122493	0.0632465	0.836505
GOTERM_CC_DIRECT	GO:0030017~sarcomere	4	1.5444	0.000395637	FBGN0086906, FBGN0264695, FBGN0003721, FBGN0005666	171	6	6122	23.8674	0.0520197	0.0263572	0.46285
SMART	SM00714:LITAF	5	1.9305	0.000819034	FBGN0050196, FBGN0263031, FBGN0050195, FBGN0085474, FBGN0085475	127	12	3269	10.7251	0.0824368	0.0282706	0.913596
GOTERM_BP_DIRECT	GO:0006936~muscle contraction	4	1.5444	0.000740106	FBGN0264695, FBGN0011286, FBGN0003721, FBGN0001991	182	7	6328	19.8681	0.336463	0.0569121	1.07572
COG_ONTOLOGY	Signal transduction mechanisms / Cytoskeleton / Cell division and chromosome partitioning / General function prediction only	4	1.5444	0.00354567	FBGN0083228, FBGN0265595, FBGN0036926, FBGN0265959	20	16	919	11.4875	0.0314622	0.0314622	2.02341
UP_KEYWORDS	Receptor	13	5.01931	0.0024494	FBGN0028675, FBGN0051201, FBGN0026255, FBGN0046113, FBGN0022800, FBGN0033515, FBGN0010389, FBGN0011286, FBGN0029723, FBGN0040505, FBGN0001250, FBGN0030941, FBGN0028422	246	152	7971	2.77126	0.314544	0.0370628	2.89906
INTERPRO	IPR001508:NMDA receptor	4	1.5444	0.000704646	FBGN0051201, FBGN0046113, FBGN0026255, FBGN0028422	199	7	7043	20.224	0.235524	0.0376397	0.971477
INTERPRO	IPR001320:Ionotropic glutamate receptor	4	1.5444	0.00110414	FBGN0051201, FBGN0046113, FBGN0026255, FBGN0028422	199	8	7043	17.696	0.34355	0.0512534	1.51834
GOTERM_BP_DIRECT	GO:0030322~stabilization of membrane potential	4	1.5444	0.00115931	FBGN0085425, FBGN0033257, FBGN0263006, FBGN0035192	182	8	6328	17.3846	0.474092	0.077187	1.68022
INTERPRO	IPR003961:Fibronectin, type III	7	2.7027	0.00132538	FBGN0035410, FBGN0086906, FBGN0053519, FBGN0016061, FBGN0086604, FBGN0033159, FBGN0005666	199	44	7043	5.63054	0.396678	0.0545978	1.82
GOTERM_BP_DIRECT	GO:0007525~somatic muscle development	6	2.3166	0.00144326	FBGN0086906, FBGN0010389, FBGN0086368, FBGN0265487, FBGN0264491, FBGN0003499	182	30	6328	6.95385	0.550735	0.0850672	2.08773
INTERPRO	IPR019594:Glutamate receptor, L-glutamate/glycine-binding	4	1.5444	0.000704646	FBGN0051201, FBGN0046113, FBGN0026255, FBGN0028422	199	7	7043	20.224	0.235524	0.0376397	0.971477
UP_KEYWORDS	Cell membrane	14	5.40541	0.00280885	FBGN0051201, FBGN0026255, FBGN0264908, FBGN0033483, FBGN0001137, FBGN0001250, FBGN0036727, FBGN0004852, FBGN0004646, FBGN0046113, FBGN0014380, FBGN0260458, FBGN0030941, FBGN0028422	246	175	7971	2.5922	0.351551	0.038614	3.31795
GOTERM_BP_DIRECT	GO:1900074~negative regulation of neuromuscular synaptic transmission	4	1.5444	0.000432	FBGN0033483, FBGN0040505, FBGN0030941, FBGN0261788	182	6	6328	23.1795	0.212884	0.0391112	0.629212
GOTERM_CC_DIRECT	GO:0015629~actin cytoskeleton	5	1.9305	0.00196315	FBGN0265991, FBGN0014863, FBGN0259209, FBGN0012051, FBGN0029881	171	20	6122	8.95029	0.233014	0.0641701	2.27747
GOTERM_CC_DIRECT	GO:0030054~cell junction	6	2.3166	0.00196646	FBGN0051201, FBGN0046113, FBGN0026255, FBGN0002526, FBGN0036727, FBGN0028422	171	33	6122	6.5093	0.233356	0.051759	2.28126
GOTERM_CC_DIRECT	GO:0005615~extracellular space	16	6.17761	0.000954695	FBGN0033483, FBGN0011822, FBGN0028988, FBGN0032666, FBGN0262057, FBGN0032178, FBGN0011828, FBGN0000278, FBGN0000279, FBGN0031869, FBGN0003984, FBGN0039914, FBGN0051146, FBGN0036091, FBGN0033731, FBGN0264815	171	217	6122	2.63972	0.120978	0.0420712	1.11354
INTERPRO	IPR001828:Extracellular ligand-binding receptor	4	1.5444	0.00226942	FBGN0051201, FBGN0046113, FBGN0026255, FBGN0028422	199	10	7043	14.1568	0.579214	0.0829224	3.09756
INTERPRO	IPR006643:ZASP	3	1.1583	0.0023156	FBGN0035917, FBGN0265991, FBGN0264489	199	3	7043	35.392	0.58657	0.0771578	3.15966
SMART	SM00079:PBPe	4	1.5444	0.00174695	FBGN0051201, FBGN0046113, FBGN0026255, FBGN0028422	127	7	3269	14.7087	0.167723	0.0448601	1.93945
UP_SEQ_FEATURE	glycosylation site:N-linked (GlcNAc...)	15	5.79151	0.00247347	FBGN0022800, FBGN0262593, FBGN0010389, FBGN0011286, FBGN0001991, FBGN0001137, FBGN0001250, FBGN0011828, FBGN0004852, FBGN0003984, FBGN0267348, FBGN0002526, FBGN0086368, FBGN0260458, FBGN0040322	58	239	2182	2.36113	0.543909	0.543909	3.28214
GOTERM_BP_DIRECT	GO:0007517~muscle organ development	8	3.0888	0.00261424	FBGN0086906, FBGN0264695, FBGN0086368, FBGN0014863, FBGN0259209, FBGN0265487, FBGN0264491, FBGN0003499	182	66	6328	4.21445	0.765473	0.134994	3.75169
SMART	SM00918:SM00918	4	1.5444	0.00174695	FBGN0051201, FBGN0046113, FBGN0026255, FBGN0028422	127	7	3269	14.7087	0.167723	0.0448601	1.93945
GOTERM_MF_DIRECT	GO:0005509~calcium ion binding	11	4.2471	0.00325688	FBGN0051999, FBGN0002773, FBGN0022800, FBGN0083228, FBGN0011286, FBGN0265595, FBGN0036926, FBGN0014380, FBGN0012051, FBGN0261260, FBGN0265959	160	131	5738	3.01135	0.468932	0.19019	3.98677
GOTERM_CC_DIRECT	GO:0030016~myofibril	3	1.1583	0.00225798	FBGN0002773, FBGN0003149, FBGN0082582	171	3	6122	35.8012	0.263003	0.0495901	2.61537
INTERPRO	IPR018247:EF-Hand 1, calcium-binding site	7	2.7027	0.00421607	FBGN0002773, FBGN0265991, FBGN0083228, FBGN0265595, FBGN0036926, FBGN0012051, FBGN0265959	199	55	7043	4.50443	0.800056	0.125535	5.68339
SMART	SM00735:ZM	3	1.1583	0.00431096	FBGN0035917, FBGN0265991, FBGN0264489	127	3	3269	25.7402	0.364682	0.086732	4.72403
GOTERM_MF_DIRECT	GO:0004687~myosin light chain kinase activity	3	1.1583	0.00441349	FBGN0086906, FBGN0259678, FBGN0005666	160	4	5738	26.8969	0.576038	0.193078	5.36704
GOTERM_CC_DIRECT	GO:0005891~voltage-gated calcium channel complex	3	1.1583	0.00443349	FBGN0001991, FBGN0259822, FBGN0261999	171	4	6122	26.8509	0.451107	0.0821242	5.0759
GOTERM_BP_DIRECT	GO:0008016~regulation of heart contraction	3	1.1583	0.00470019	FBGN0262593, FBGN0060296, FBGN0264491	182	4	6328	26.0769	0.926469	0.211227	6.65073
GOTERM_BP_DIRECT	GO:0007522~visceral muscle development	3	1.1583	0.00470019	FBGN0086906, FBGN0010389, FBGN0040505	182	4	6328	26.0769	0.926469	0.211227	6.65073
GOTERM_MF_DIRECT	GO:0008307~structural constituent of muscle	4	1.5444	0.00486704	FBGN0086906, FBGN0264695, FBGN0014863, FBGN0005666	160	13	5738	11.0346	0.611907	0.172464	5.9033
GOTERM_CC_DIRECT	GO:0097482~muscle cell postsynaptic density	4	1.5444	0.0049006	FBGN0051201, FBGN0046113, FBGN0265416, FBGN0028422	171	13	6122	11.0157	0.484804	0.0795577	5.59673
UP_KEYWORDS	Cell junction	7	2.7027	0.00494229	FBGN0051201, FBGN0046113, FBGN0026255, FBGN0002526, FBGN0036727, FBGN0028422, FBGN0004646	246	52	7971	4.36187	0.533734	0.061604	5.77029
UP_KEYWORDS	Postsynaptic cell membrane	4	1.5444	0.0051367	FBGN0051201, FBGN0046113, FBGN0026255, FBGN0028422	246	12	7971	10.8008	0.547555	0.0591833	5.99091
UP_KEYWORDS	Transmembrane helix	68	26.2548	0.00559155	FBGN0051201, FBGN0250838, FBGN0038809, FBGN0033515, FBGN0010389, FBGN0053203, FBGN0039277, FBGN0032900, FBGN0001137, FBGN0035649, FBGN0261999, FBGN0028663, FBGN0036211, FBGN0260775, FBGN0033129, FBGN0259994, FBGN0263006, FBGN0033483, FBGN0001991, FBGN0260482, FBGN0031548, FBGN0031401, FBGN0004852, FBGN0031150, FBGN0085425, FBGN0016061, FBGN0031080, FBGN0261260, FBGN0031307, FBGN0028422, FBGN00318…	246	1635	7971	1.34762	0.578323	0.059816	6.50521
UP_KEYWORDS	Glycoprotein	18	6.94981	0.00565007	FBGN0022800, FBGN0262593, FBGN0010389, FBGN0033483, FBGN0028988, FBGN0001991, FBGN0001137, FBGN0001250, FBGN0262057, FBGN0011828, FBGN0004852, FBGN0051217, FBGN0003984, FBGN0267348, FBGN0002526, FBGN0086368, FBGN0260458, FBGN0040322	246	280	7971	2.08301	0.582127	0.0565123	6.5712
UP_KEYWORDS	Transmembrane	68	26.2548	0.00584243	FBGN0051201, FBGN0250838, FBGN0038809, FBGN0033515, FBGN0010389, FBGN0053203, FBGN0039277, FBGN0032900, FBGN0001137, FBGN0035649, FBGN0261999, FBGN0028663, FBGN0036211, FBGN0260775, FBGN0033129, FBGN0259994, FBGN0263006, FBGN0033483, FBGN0001991, FBGN0260482, FBGN0031548, FBGN0031401, FBGN0004852, FBGN0031150, FBGN0085425, FBGN0016061, FBGN0031080, FBGN0261260, FBGN0031307, FBGN0028422, FBGN00318…	246	1638	7971	1.34516	0.594394	0.0548374	6.78778
GOTERM_MF_DIRECT	GO:0022841~potassium ion leak channel activity	3	1.1583	0.00722218	FBGN0085425, FBGN0033257, FBGN0035192	160	5	5738	21.5175	0.754924	0.208927	8.64323
GOTERM_MF_DIRECT	GO:0022849~glutamate-gated calcium ion channel activity	3	1.1583	0.00722218	FBGN0051201, FBGN0046113, FBGN0028422	160	5	5738	21.5175	0.754924	0.208927	8.64323
GOTERM_MF_DIRECT	GO:0005267~potassium channel activity	3	1.1583	0.00722218	FBGN0085425, FBGN0033257, FBGN0035192	160	5	5738	21.5175	0.754924	0.208927	8.64323
GOTERM_MF_DIRECT	GO:0008083~growth factor activity	4	1.5444	0.00743449	FBGN0014135, FBGN0033649, FBGN0039914, FBGN0031888	160	15	5738	9.56333	0.764885	0.186827	8.88658
INTERPRO	IPR003280:Two pore domain potassium channel	3	1.1583	0.00743579	FBGN0085425, FBGN0033257, FBGN0035192	199	5	7043	21.2352	0.941786	0.19647	9.82022
GOTERM_BP_DIRECT	GO:0008347~glial cell migration	5	1.9305	0.00774689	FBGN0014135, FBGN0033649, FBGN0010389, FBGN0264491, FBGN0003460	182	28	6328	6.20879	0.986546	0.301654	10.7391
GOTERM_BP_DIRECT	GO:0010629~negative regulation of gene expression	6	2.3166	0.00796875	FBGN0033061, FBGN0030257, FBGN0030102, FBGN0036282, FBGN0002521, FBGN0033633	182	44	6328	4.74126	0.988114	0.288907	11.0302
UP_KEYWORDS	Muscle protein	4	1.5444	0.00812148	FBGN0002773, FBGN0264695, FBGN0003721, FBGN0003149	246	14	7971	9.25784	0.715156	0.0712089	9.31908
UP_SEQ_FEATURE	signal peptide	13	5.01931	0.00846637	FBGN0043534, FBGN0022800, FBGN0003984, FBGN0267348, FBGN0002526, FBGN0010389, FBGN0001137, FBGN0001250, FBGN0011828, FBGN0000278, FBGN0000279, FBGN0028422, FBGN0040322	58	217	2182	2.25377	0.932476	0.740145	10.8253
INTERPRO	IPR011009:Protein kinase-like domain	14	5.40541	0.00859248	FBGN0022800, FBGN0259680, FBGN0051098, FBGN0053519, FBGN0010389, FBGN0015024, FBGN0259678, FBGN0025702, FBGN0040505, FBGN0039324, FBGN0031855, FBGN0039321, FBGN0005666, FBGN0046706	199	219	7043	2.2625	0.962667	0.20931	11.2648
GOTERM_MF_DIRECT	GO:0015277~kainate selective glutamate receptor activity	3	1.1583	0.0106369	FBGN0046113, FBGN0026255, FBGN0028422	160	6	5738	17.9312	0.874395	0.228429	12.4857
GOTERM_MF_DIRECT	GO:0004970~ionotropic glutamate receptor activity	3	1.1583	0.0106369	FBGN0051201, FBGN0046113, FBGN0028422	160	6	5738	17.9312	0.874395	0.228429	12.4857
UP_KEYWORDS	Immunity	7	2.7027	0.0107278	FBGN0033483, FBGN0028988, FBGN0260458, FBGN0000278, FBGN0000279, FBGN0040322, FBGN0051217	246	61	7971	3.71831	0.810052	0.0881484	12.1365
GOTERM_BP_DIRECT	GO:0035249~synaptic transmission, glutamatergic	3	1.1583	0.0113138	FBGN0051201, FBGN0046113, FBGN0028422	182	6	6328	17.3846	0.99817	0.362535	15.3135
GOTERM_BP_DIRECT	GO:0030510~regulation of BMP signaling pathway	4	1.5444	0.0116455	FBGN0051201, FBGN0046113, FBGN0265416, FBGN0028422	182	17	6328	8.181	0.998481	0.3512	15.7276
UP_SEQ_FEATURE	splice variant	22	8.49421	0.0121499	FBGN0262593, FBGN0264695, FBGN0003721, FBGN0011286, FBGN0001991, FBGN0001250, FBGN0011296, FBGN0266451, FBGN0264491, FBGN0011828, FBGN0265959, FBGN0023076, FBGN0003984, FBGN0086906, FBGN0037817, FBGN0265487, FBGN0263006, FBGN0260458, FBGN0260943, FBGN0012051, FBGN0001145, FBGN0040322	58	503	2182	1.64544	0.979248	0.725198	15.1874
GOTERM_CC_DIRECT	GO:0016021~integral component of membrane	57	22.0077	0.0122814	FBGN0250838, FBGN0038809, FBGN0033515, FBGN0010389, FBGN0053203, FBGN0032900, FBGN0039277, FBGN0001137, FBGN0035649, FBGN0028663, FBGN0036211, FBGN0260775, FBGN0033129, FBGN0259994, FBGN0263006, FBGN0260482, FBGN0031548, FBGN0031401, FBGN0004852, FBGN0031150, FBGN0085425, FBGN0016061, FBGN0031080, FBGN0261260, FBGN0031307, FBGN0031887, FBGN0262509, FBGN0039467, FBGN0086604, FBGN0034438, FBGN00046…	171	1537	6122	1.32769	0.811423	0.169196	13.4869
UP_SEQ_FEATURE	disulfide bond	10	3.861	0.0123409	FBGN0043534, FBGN0003984, FBGN0267348, FBGN0002526, FBGN0086906, FBGN0010389, FBGN0001137, FBGN0003149, FBGN0260458, FBGN0011828	58	147	2182	2.55923	0.980482	0.626225	15.4081
INTERPRO	IPR005821:Ion transport domain	4	1.5444	0.0130774	FBGN0262593, FBGN0060296, FBGN0011286, FBGN0001991	199	18	7043	7.86488	0.993365	0.284202	16.6655
INTERPRO	IPR011992:EF-hand-like domain	7	2.7027	0.0134926	FBGN0002773, FBGN0083228, FBGN0011286, FBGN0265595, FBGN0036926, FBGN0012051, FBGN0265959	199	70	7043	3.5392	0.994348	0.276374	17.1497
INTERPRO	IPR013099:Ion transport 2	3	1.1583	0.0150455	FBGN0085425, FBGN0033257, FBGN0035192	199	7	7043	15.168	0.996899	0.288058	18.9377
INTERPRO	IPR002172:Low-density lipoprotein (LDL) receptor class A repeat	4	1.5444	0.0152134	FBGN0265416, FBGN0040505, FBGN0261260, FBGN0051217	199	19	7043	7.45094	0.997094	0.277105	19.1289
GOTERM_BP_DIRECT	GO:0016203~muscle attachment	5	1.9305	0.0153674	FBGN0003984, FBGN0086906, FBGN0086368, FBGN0001250, FBGN0264491	182	34	6328	5.11312	0.999812	0.415048	20.2464
GOTERM_BP_DIRECT	GO:0071805~potassium ion transmembrane transport	3	1.1583	0.0155433	FBGN0085425, FBGN0033257, FBGN0035192	182	7	6328	14.9011	0.99983	0.399809	20.4544
GOTERM_BP_DIRECT	GO:0034446~substrate adhesion-dependent cell spreading	3	1.1583	0.0155433	FBGN0267348, FBGN0002526, FBGN0001250	182	7	6328	14.9011	0.99983	0.399809	20.4544
UP_KEYWORDS	Membrane	73	28.1853	0.0165315	FBGN0051201, FBGN0250838, FBGN0038809, FBGN0033515, FBGN0053203, FBGN0010389, FBGN0039277, FBGN0032900, FBGN0001137, FBGN0035649, FBGN0261999, FBGN0028663, FBGN0036211, FBGN0260775, FBGN0033129, FBGN0259994, FBGN0263006, FBGN0031688, FBGN0033483, FBGN0001991, FBGN0260482, FBGN0031548, FBGN0031401, FBGN0004852, FBGN0031150, FBGN0085425, FBGN0016061, FBGN0014380, FBGN0031080, FBGN0261260, FBGN00375…	246	1865	7971	1.2683	0.923245	0.126382	18.1245
GOTERM_CC_DIRECT	GO:0005886~plasma membrane	23	8.88031	0.0176251	FBGN0262509, FBGN0026255, FBGN0259680, FBGN0262593, FBGN0010389, FBGN0264908, FBGN0033483, FBGN0265262, FBGN0001137, FBGN0001250, FBGN0035649, FBGN0010497, FBGN0036727, FBGN0004852, FBGN0004646, FBGN0003984, FBGN0027865, FBGN0263598, FBGN0014380, FBGN0261260, FBGN0027356, FBGN0261788, FBGN0031307	171	494	6122	1.66686	0.909337	0.213419	18.8178
INTERPRO	IPR000719:Protein kinase, catalytic domain	11	4.2471	0.0176364	FBGN0022800, FBGN0259680, FBGN0010389, FBGN0053519, FBGN0015024, FBGN0040505, FBGN0031855, FBGN0259678, FBGN0025702, FBGN0005666, FBGN0046706	199	165	7043	2.35946	0.998863	0.300096	21.8414
GOTERM_CC_DIRECT	GO:0045211~postsynaptic membrane	4	1.5444	0.0193715	FBGN0051201, FBGN0046113, FBGN0026255, FBGN0028422	171	21	6122	6.81927	0.928697	0.213431	20.4938
UP_SEQ_FEATURE	topological domain:Cytoplasmic	11	4.2471	0.0198069	FBGN0022800, FBGN0060296, FBGN0010389, FBGN0011286, FBGN0001137, FBGN0001991, FBGN0001250, FBGN0263006, FBGN0260458, FBGN0004852, FBGN0004646	58	186	2182	2.22488	0.998239	0.718708	23.6302
INTERPRO	IPR002048:EF-hand domain	6	2.3166	0.0199955	FBGN0002773, FBGN0083228, FBGN0265595, FBGN0036926, FBGN0012051, FBGN0265959	199	56	7043	3.792	0.999545	0.319395	24.4011
GOTERM_BP_DIRECT	GO:0008543~fibroblast growth factor receptor signaling pathway	3	1.1583	0.020338	FBGN0014135, FBGN0033649, FBGN0010389	182	8	6328	13.0385	0.999989	0.468691	25.93
INTERPRO	IPR000742:Epidermal growth factor-like domain	6	2.3166	0.0214336	FBGN0051999, FBGN0003984, FBGN0267348, FBGN0002526, FBGN0001137, FBGN0261260	199	57	7043	3.72547	0.99974	0.325035	25.9231
INTERPRO	IPR017441:Protein kinase, ATP binding site	9	3.4749	0.0222196	FBGN0022800, FBGN0259680, FBGN0010389, FBGN0015024, FBGN0040505, FBGN0259678, FBGN0025702, FBGN0005666, FBGN0046706	199	123	7043	2.58966	0.999809	0.322363	26.7429
UP_KEYWORDS	Transport	20	7.72201	0.0240274	FBGN0051201, FBGN0028675, FBGN0043534, FBGN0026255, FBGN0262593, FBGN0011286, FBGN0264908, FBGN0001991, FBGN0265262, FBGN0033257, FBGN0036727, FBGN0004646, FBGN0035192, FBGN0085425, FBGN0060296, FBGN0046113, FBGN0030733, FBGN0263598, FBGN0263006, FBGN0028422	246	378	7971	1.71441	0.976374	0.17078	25.3047
INTERPRO	IPR013162:CD80-like, immunoglobulin C2-set	3	1.1583	0.0248556	FBGN0262509, FBGN0016061, FBGN0086604	199	9	7043	11.7973	0.999932	0.340941	29.4312
INTERPRO	IPR013320:Concanavalin A-like lectin/glucanase, subgroup	5	1.9305	0.0251485	FBGN0002526, FBGN0011286, FBGN0040505, FBGN0260660, FBGN0040322	199	40	7043	4.42399	0.999939	0.332582	29.7242
GOTERM_BP_DIRECT	GO:0060025~regulation of synaptic activity	3	1.1583	0.0256624	FBGN0051201, FBGN0262593, FBGN0026255	182	9	6328	11.5897	0.999999	0.531412	31.5981
GOTERM_BP_DIRECT	GO:0060361~flight	3	1.1583	0.0256624	FBGN0002773, FBGN0264695, FBGN0265416	182	9	6328	11.5897	0.999999	0.531412	31.5981
GOTERM_BP_DIRECT	GO:0019722~calcium-mediated signaling	3	1.1583	0.0256624	FBGN0001991, FBGN0265959, FBGN0259822	182	9	6328	11.5897	0.999999	0.531412	31.5981
KEGG_PATHWAY	dme04145:Phagosome	4	1.5444	0.0269007	FBGN0000046, FBGN0265262, FBGN0263598, FBGN0028663	30	48	2103	5.84167	0.614965	0.614965	21.4582
SMART	SM00054:EFh	6	2.3166	0.0279318	FBGN0002773, FBGN0083228, FBGN0265595, FBGN0036926, FBGN0012051, FBGN0265959	127	45	3269	3.43202	0.948931	0.390894	27.1905
INTERPRO	IPR001781:Zinc finger, LIM-type	4	1.5444	0.0286852	FBGN0265991, FBGN0014863, FBGN0041789, FBGN0259209	199	24	7043	5.89866	0.999985	0.358249	33.174
UP_KEYWORDS	Growth factor	3	1.1583	0.0293715	FBGN0014135, FBGN0003984, FBGN0039914	246	9	7971	10.8008	0.989857	0.196371	30.0661
KEGG_PATHWAY	dme04391:Hippo signaling pathway - fly	4	1.5444	0.0299282	FBGN0000046, FBGN0003984, FBGN0033483, FBGN0030941	30	50	2103	5.608	0.654748	0.412419	23.5964
UP_KEYWORDS	Innate immunity	6	2.3166	0.0301347	FBGN0033483, FBGN0260458, FBGN0000278, FBGN0000279, FBGN0040322, FBGN0051217	246	57	7971	3.41078	0.991014	0.192802	30.7228
UP_SEQ_FEATURE	topological domain:Extracellular	8	3.0888	0.0302498	FBGN0022800, FBGN0060296, FBGN0010389, FBGN0001137, FBGN0001991, FBGN0001250, FBGN0260458, FBGN0004646	58	117	2182	2.57235	0.999941	0.802668	33.8944
GOTERM_BP_DIRECT	GO:0046034~ATP metabolic process	3	1.1583	0.0314827	FBGN0022709, FBGN0265262, FBGN0263598	182	10	6328	10.4308	1	0.587737	37.3304
INTERPRO	IPR001214:SET domain	4	1.5444	0.0319393	FBGN0033061, FBGN0030257, FBGN0030102, FBGN0033633	199	25	7043	5.66271	0.999996	0.378532	36.2087
UP_KEYWORDS	Alternative splicing	25	9.65251	0.0322912	FBGN0262593, FBGN0265991, FBGN0001250, FBGN0011296, FBGN0003984, FBGN0266446, FBGN0265726, FBGN0003149, FBGN0263006, FBGN0012051, FBGN0040322, FBGN0264695, FBGN0011286, FBGN0003721, FBGN0266719, FBGN0033483, FBGN0001991, FBGN0266451, FBGN0011828, FBGN0264491, FBGN0023076, FBGN0086906, FBGN0265487, FBGN0260943, FBGN0001145	246	525	7971	1.54297	0.993622	0.197304	32.5483
INTERPRO	IPR001806:Small GTPase superfamily	5	1.9305	0.0342746	FBGN0035711, FBGN0029959, FBGN0014380, FBGN0265605, FBGN0085426	199	44	7043	4.02181	0.999998	0.388681	38.3072
UP_KEYWORDS	LIM domain	4	1.5444	0.0360627	FBGN0265991, FBGN0014863, FBGN0041789, FBGN0259209	246	24	7971	5.40041	0.996504	0.209965	35.6351
INTERPRO	IPR020849:Small GTPase superfamily, Ras type	3	1.1583	0.0366013	FBGN0035711, FBGN0265605, FBGN0085426	199	11	7043	9.65235	0.999999	0.39793	40.3341
INTERPRO	IPR013032:EGF-like, conserved site	5	1.9305	0.0368197	FBGN0051999, FBGN0003984, FBGN0002526, FBGN0001137, FBGN0261260	199	45	7043	3.93244	0.999999	0.389126	40.5212
GOTERM_CC_DIRECT	GO:0005887~integral component of plasma membrane	13	5.01931	0.0372524	FBGN0085425, FBGN0022800, FBGN0027865, FBGN0029723, FBGN0033129, FBGN0001250, FBGN0033159, FBGN0013953, FBGN0033257, FBGN0263006, FBGN0260458, FBGN0030941, FBGN0035192	171	243	6122	1.91529	0.994055	0.347598	35.9226
GOTERM_BP_DIRECT	GO:0007427~epithelial cell migration, open tracheal system	4	1.5444	0.0406931	FBGN0014135, FBGN0264695, FBGN0001250, FBGN0003499	182	27	6328	5.151	1	0.665787	45.4949
SMART	SM00060:FN3	5	1.9305	0.043771	FBGN0035410, FBGN0086906, FBGN0053519, FBGN0033159, FBGN0005666	127	35	3269	3.67717	0.990901	0.488991	39.4284
GOTERM_BP_DIRECT	GO:0006468~protein phosphorylation	11	4.2471	0.045053	FBGN0022800, FBGN0259680, FBGN0010389, FBGN0053519, FBGN0015024, FBGN0040505, FBGN0031855, FBGN0259678, FBGN0025702, FBGN0005666, FBGN0046706	182	190	6328	2.01296	1	0.686786	49.0038
UP_SEQ_FEATURE	domain:EF-hand 3	3	1.1583	0.0498989	FBGN0002773, FBGN0012051, FBGN0265959	58	14	2182	8.06158	1	0.901533	49.8302
INTERPRO	IPR013106:Immunoglobulin V-set	3	1.1583	0.0500399	FBGN0262509, FBGN0016061, FBGN0086604	199	13	7043	8.16738	1	0.478976	50.8825
UP_SEQ_FEATURE	domain:Laminin IV type A	2	0.772201	0.0515749	FBGN0267348, FBGN0002526	58	2	2182	37.6207	1	0.877328	51.0098
UP_SEQ_FEATURE	region of interest:Domain II and I	2	0.772201	0.0515749	FBGN0267348, FBGN0002526	58	2	2182	37.6207	1	0.877328	51.0098
GOTERM_BP_DIRECT	GO:0007274~neuromuscular synaptic transmission	5	1.9305	0.0537974	FBGN0051201, FBGN0046113, FBGN0265416, FBGN0263006, FBGN0028422	182	50	6328	3.47692	1	0.736044	55.4162
GOTERM_MF_DIRECT	GO:0005245~voltage-gated calcium channel activity	2	0.772201	0.0546569	FBGN0001991, FBGN0259822	160	2	5738	35.8625	0.999982	0.702273	50.3904
GOTERM_MF_DIRECT	GO:0005104~fibroblast growth factor receptor binding	2	0.772201	0.0546569	FBGN0014135, FBGN0033649	160	2	5738	35.8625	0.999982	0.702273	50.3904
GOTERM_MF_DIRECT	GO:0051371~muscle alpha-actinin binding	2	0.772201	0.0546569	FBGN0035917, FBGN0265991	160	2	5738	35.8625	0.999982	0.702273	50.3904
GOTERM_MF_DIRECT	GO:0008068~extracellular-glutamate-gated chloride channel activity	2	0.772201	0.0546569	FBGN0264908, FBGN0036727	160	2	5738	35.8625	0.999982	0.702273	50.3904
GOTERM_CC_DIRECT	GO:0032982~myosin filament	2	0.772201	0.0547707	FBGN0264695, FBGN0003149	171	2	6122	35.8012	0.999502	0.442862	48.334
GOTERM_CC_DIRECT	GO:0034704~calcium channel complex	2	0.772201	0.0547707	FBGN0060296, FBGN0011286	171	2	6122	35.8012	0.999502	0.442862	48.334
INTERPRO	IPR002209:Heparin-binding growth factor/Fibroblast growth factor	2	0.772201	0.0554396	FBGN0014135, FBGN0033649	199	2	7043	35.392	1	0.503904	54.611
INTERPRO	IPR005725:ATPase, V1 complex, subunit A	2	0.772201	0.0554396	FBGN0265262, FBGN0263598	199	2	7043	35.392	1	0.503904	54.611
INTERPRO	IPR022878:V-type ATP synthase catalytic subunit A/alpha	2	0.772201	0.0554396	FBGN0265262, FBGN0263598	199	2	7043	35.392	1	0.503904	54.611
INTERPRO	IPR008996:Cytokine, IL-1-like	2	0.772201	0.0554396	FBGN0014135, FBGN0033649	199	2	7043	35.392	1	0.503904	54.611
INTERPRO	IPR006028:Gamma-aminobutyric acid A receptor	2	0.772201	0.0554396	FBGN0264908, FBGN0036727	199	2	7043	35.392	1	0.503904	54.611
INTERPRO	IPR000215:Serpin family	3	1.1583	0.057324	FBGN0028988, FBGN0262057, FBGN0032178	199	14	7043	7.58399	1	0.504831	55.8491
INTERPRO	IPR023796:Serpin domain	3	1.1583	0.057324	FBGN0028988, FBGN0262057, FBGN0032178	199	14	7043	7.58399	1	0.504831	55.8491
UP_KEYWORDS	Sensory transduction	5	1.9305	0.0590988	FBGN0043534, FBGN0060296, FBGN0001250, FBGN0265487, FBGN0265959	246	48	7971	3.37525	0.999916	0.312882	51.8458
UP_KEYWORDS	Thick filament	2	0.772201	0.0605318	FBGN0264695, FBGN0003149	246	2	7971	32.4024	0.999933	0.309159	52.7183
GOTERM_CC_DIRECT	GO:0031012~extracellular matrix	4	1.5444	0.062496	FBGN0267348, FBGN0260660, FBGN0035985, FBGN0033731	171	33	6122	4.33954	0.999835	0.463289	53.0732
SMART	SM00132:LIM	4	1.5444	0.0627325	FBGN0265991, FBGN0014863, FBGN0041789, FBGN0259209	127	24	3269	4.29003	0.998889	0.572723	51.6009
GOTERM_CC_DIRECT	GO:0016459~myosin complex	3	1.1583	0.0635253	FBGN0002773, FBGN0264695, FBGN0003149	171	15	6122	7.16023	0.999858	0.446058	53.6737
GOTERM_BP_DIRECT	GO:0007264~small GTPase mediated signal transduction	5	1.9305	0.0641066	FBGN0035711, FBGN0014380, FBGN0037551, FBGN0265605, FBGN0085426	182	53	6328	3.28012	1	0.783325	62.0094
UP_KEYWORDS	Calcium transport	3	1.1583	0.0671584	FBGN0011286, FBGN0001991, FBGN0263006	246	14	7971	6.94338	0.999978	0.327344	56.5674
GOTERM_MF_DIRECT	GO:0004867~serine-type endopeptidase inhibitor activity	4	1.5444	0.071662	FBGN0038654, FBGN0028988, FBGN0262057, FBGN0032178	160	35	5738	4.09857	0.999999	0.763681	60.4406
GOTERM_BP_DIRECT	GO:0007528~neuromuscular junction development	4	1.5444	0.0721163	FBGN0083228, FBGN0265416, FBGN0051146, FBGN0261788	182	34	6328	4.0905	1	0.809604	66.4921
UP_SEQ_FEATURE	transmembrane region	14	5.40541	0.0736067	FBGN0262593, FBGN0022800, FBGN0010389, FBGN0011286, FBGN0001137, FBGN0001991, FBGN0001250, FBGN0004852, FBGN0004646, FBGN0060296, FBGN0260775, FBGN0086368, FBGN0263006, FBGN0260458	58	327	2182	1.61067	1	0.93232	64.3091
UP_KEYWORDS	Myosin	3	1.1583	0.0759636	FBGN0002773, FBGN0264695, FBGN0003149	246	15	7971	6.48049	0.999995	0.352425	61.238
UP_SEQ_FEATURE	domain:Laminin EGF-like 7	2	0.772201	0.0763732	FBGN0267348, FBGN0002526	58	3	2182	25.0805	1	0.919418	65.7188
UP_SEQ_FEATURE	domain:MIR 2	2	0.772201	0.0763732	FBGN0011286, FBGN0086368	58	3	2182	25.0805	1	0.919418	65.7188
UP_SEQ_FEATURE	domain:Laminin EGF-like 6	2	0.772201	0.0763732	FBGN0267348, FBGN0002526	58	3	2182	25.0805	1	0.919418	65.7188
UP_SEQ_FEATURE	domain:Laminin EGF-like 8	2	0.772201	0.0763732	FBGN0267348, FBGN0002526	58	3	2182	25.0805	1	0.919418	65.7188
UP_SEQ_FEATURE	domain:MIR 3	2	0.772201	0.0763732	FBGN0011286, FBGN0086368	58	3	2182	25.0805	1	0.919418	65.7188
UP_SEQ_FEATURE	domain:Laminin EGF-like 10	2	0.772201	0.0763732	FBGN0267348, FBGN0002526	58	3	2182	25.0805	1	0.919418	65.7188
UP_SEQ_FEATURE	domain:Laminin EGF-like 4	2	0.772201	0.0763732	FBGN0267348, FBGN0002526	58	3	2182	25.0805	1	0.919418	65.7188
UP_SEQ_FEATURE	domain:Laminin EGF-like 9	2	0.772201	0.0763732	FBGN0267348, FBGN0002526	58	3	2182	25.0805	1	0.919418	65.7188
UP_SEQ_FEATURE	domain:MIR 1	2	0.772201	0.0763732	FBGN0011286, FBGN0086368	58	3	2182	25.0805	1	0.919418	65.7188
COG_ONTOLOGY	Transcription / Cell division and chromosome partitioning	3	1.1583	0.0791568	FBGN0004892, FBGN0004859, FBGN0003499	20	23	919	5.99348	0.523929	0.310021	37.7859
GOTERM_MF_DIRECT	GO:0004723~calcium-dependent protein serine/threonine phosphatase activity	2	0.772201	0.0808615	FBGN0010015, FBGN0265959	160	3	5738	23.9083	1	0.773966	65.0612
GOTERM_MF_DIRECT	GO:0005230~extracellular ligand-gated ion channel activity	2	0.772201	0.0808615	FBGN0264908, FBGN0036727	160	3	5738	23.9083	1	0.773966	65.0612
GOTERM_CC_DIRECT	GO:0036062~presynaptic periactive zone	2	0.772201	0.0810271	FBGN0002526, FBGN0261788	171	3	6122	23.8674	0.999989	0.509808	62.866
GOTERM_CC_DIRECT	GO:0031672~A band	2	0.772201	0.0810271	FBGN0264695, FBGN0038294	171	3	6122	23.8674	0.999989	0.509808	62.866
GOTERM_CC_DIRECT	GO:0031674~I band	2	0.772201	0.0810271	FBGN0086906, FBGN0005666	171	3	6122	23.8674	0.999989	0.509808	62.866
GOTERM_BP_DIRECT	GO:0007155~cell adhesion	6	2.3166	0.0815389	FBGN0001250, FBGN0032666, FBGN0260660, FBGN0014380, FBGN0264491, FBGN0260799	182	81	6328	2.5755	1	0.836728	71.1335
INTERPRO	IPR024034:ATPase, F1 complex beta subunit/V1 complex, C-terminal	2	0.772201	0.0820016	FBGN0265262, FBGN0263598	199	3	7043	23.5946	1	0.627614	69.4234
INTERPRO	IPR000034:Laminin B type IV	2	0.772201	0.0820016	FBGN0267348, FBGN0002526	199	3	7043	23.5946	1	0.627614	69.4234
GOTERM_BP_DIRECT	GO:0042051~compound eye photoreceptor development	3	1.1583	0.0835616	FBGN0040505, FBGN0036282, FBGN0033633	182	17	6328	6.13575	1	0.833116	72.0484
GOTERM_BP_DIRECT	GO:0035099~hemocyte migration	3	1.1583	0.0835616	FBGN0001250, FBGN0014380, FBGN0031888	182	17	6328	6.13575	1	0.833116	72.0484
GOTERM_CC_DIRECT	GO:0005622~intracellular	11	4.2471	0.0848533	FBGN0035711, FBGN0259680, FBGN0003984, FBGN0033483, FBGN0050440, FBGN0014380, FBGN0012051, FBGN0037551, FBGN0265605, FBGN0004852, FBGN0085426	171	220	6122	1.79006	0.999994	0.505472	64.6387
UP_KEYWORDS	EGF-like domain	4	1.5444	0.0854676	FBGN0051999, FBGN0003984, FBGN0001137, FBGN0261260	246	34	7971	3.81205	0.999999	0.377766	65.7592
UP_SEQ_FEATURE	domain:Protein kinase	5	1.9305	0.0911949	FBGN0022800, FBGN0259680, FBGN0010389, FBGN0015024, FBGN0046706	58	66	2182	2.85005	1	0.936437	72.4335
GOTERM_BP_DIRECT	GO:0006811~ion transport	3	1.1583	0.0922961	FBGN0026255, FBGN0036727, FBGN0004646	182	18	6328	5.79487	1	0.852804	75.6975
GOTERM_BP_DIRECT	GO:0007494~midgut development	3	1.1583	0.0922961	FBGN0003984, FBGN0267348, FBGN0001250	182	18	6328	5.79487	1	0.852804	75.6975
UP_KEYWORDS	Coiled coil	43	16.6023	0.0935038	FBGN0262593, FBGN0035410, FBGN0030102, FBGN0052982, FBGN0085450, FBGN0038977, FBGN0037448, FBGN0003499, FBGN0031869, FBGN0003984, FBGN0267348, FBGN0028622, FBGN0002526, FBGN0031251, FBGN0266446, FBGN0003149, FBGN0027356, FBGN0265268, FBGN0005666, FBGN0037231, FBGN0261788, FBGN0259680, FBGN0053519, FBGN0264695, FBGN0003721, FBGN0033483, FBGN0264489, FBGN0024366, FBGN0036364, FBGN0051374, FBGN00203…	246	1118	7971	1.24625	1	0.395849	69.1992
INTERPRO	IPR005225:Small GTP-binding protein domain	5	1.9305	0.0960641	FBGN0035711, FBGN0029959, FBGN0014380, FBGN0037551, FBGN0265605	199	62	7043	2.85419	1	0.677534	75.309
INTERPRO	IPR020635:Tyrosine-protein kinase, catalytic domain	3	1.1583	0.0983894	FBGN0022800, FBGN0010389, FBGN0040505	199	19	7043	5.5882	1	0.676146	76.1742
SMART	SM00093:SERPIN	3	1.1583	0.0991633	FBGN0028988, FBGN0262057, FBGN0032178	127	14	3269	5.51575	0.999983	0.704287	68.9559

## Sheet: Gland
Category	Term	Count	%	PValue	Genes	List Total	Pop Hits	Pop Total	Fold Enrichment	Bonferroni	Benjamini	FDR
GOTERM_BP_DIRECT	GO:0006487~protein N-linked glycosylation	7	5.69106	8.35752e-08	FBGN0037743, FBGN0036300, FBGN0032477, FBGN0032799, FBGN0034277, FBGN0053774, FBGN0261020	99	16	6328	27.9646	2.69944e-05	2.69944e-05	0.000112939
UP_KEYWORDS	Membrane	50	40.6504	2.55464e-06	FBGN0051072, FBGN0037743, FBGN0035449, FBGN0035909, FBGN0039172, FBGN0039875, FBGN0032850, FBGN0001987, FBGN0038404, FBGN0053635, FBGN0051523, FBGN0011336, FBGN0036773, FBGN0034392, FBGN0014906, FBGN0267330, FBGN0261020, FBGN0032074, FBGN0003328, FBGN0032079, FBGN0053774, FBGN0052815, FBGN0031530, FBGN0050489, FBGN0053503, FBGN0260855, FBGN0011509, FBGN0033302, FBGN0034436, FBGN0040491, FBGN00342…	115	1865	7971	1.85826	0.000224784	5.62006e-05	0.00276705
UP_KEYWORDS	Transmembrane	46	37.3984	2.5494e-06	FBGN0051072, FBGN0037743, FBGN0031530, FBGN0035909, FBGN0035449, FBGN0039172, FBGN0260855, FBGN0011509, FBGN0034436, FBGN0040491, FBGN0034277, FBGN0032850, FBGN0039875, FBGN0028491, FBGN0001987, FBGN0034389, FBGN0038404, FBGN0053635, FBGN0028572, FBGN0038721, FBGN0262801, FBGN0051523, FBGN0045866, FBGN0032477, FBGN0036205, FBGN0263852, FBGN0264087, FBGN0036773, FBGN0011336, FBGN0019952, FBGN00343…	115	1638	7971	1.94652	0.000224322	7.47796e-05	0.00276137
GOTERM_CC_DIRECT	GO:0016021~integral component of membrane	46	37.3984	1.29498e-06	FBGN0051072, FBGN0037743, FBGN0031530, FBGN0035909, FBGN0035449, FBGN0039172, FBGN0260855, FBGN0011509, FBGN0034436, FBGN0040491, FBGN0034277, FBGN0032850, FBGN0039875, FBGN0028491, FBGN0001987, FBGN0034389, FBGN0038404, FBGN0053635, FBGN0028572, FBGN0038721, FBGN0262801, FBGN0051523, FBGN0045866, FBGN0032477, FBGN0036205, FBGN0263852, FBGN0264087, FBGN0036773, FBGN0011336, FBGN0019952, FBGN00343…	95	1537	6122	1.92865	9.45293e-05	9.45293e-05	0.00135169
UP_KEYWORDS	Transmembrane helix	46	37.3984	2.41989e-06	FBGN0051072, FBGN0037743, FBGN0031530, FBGN0035909, FBGN0035449, FBGN0039172, FBGN0260855, FBGN0011509, FBGN0034436, FBGN0040491, FBGN0034277, FBGN0032850, FBGN0039875, FBGN0028491, FBGN0001987, FBGN0034389, FBGN0038404, FBGN0053635, FBGN0028572, FBGN0038721, FBGN0262801, FBGN0051523, FBGN0045866, FBGN0032477, FBGN0036205, FBGN0263852, FBGN0264087, FBGN0036773, FBGN0011336, FBGN0019952, FBGN00343…	115	1635	7971	1.95009	0.000212928	0.00010647	0.0026211
UP_KEYWORDS	Endoplasmic reticulum	13	10.5691	1.34712e-06	FBGN0262801, FBGN0037743, FBGN0263260, FBGN0263852, FBGN0032799, FBGN0039875, FBGN0034756, FBGN0005585, FBGN0053774, FBGN0039172, FBGN0033302, FBGN0267330, FBGN0261020	115	150	7971	6.00713	0.000118539	0.000118539	0.00145913
GOTERM_CC_DIRECT	GO:0012505~endomembrane system	14	11.3821	4.85556e-06	FBGN0032398, FBGN0262801, FBGN0045866, FBGN0035909, FBGN0263852, FBGN0011336, FBGN0005585, FBGN0037467, FBGN0011509, FBGN0023529, FBGN0263260, FBGN0033906, FBGN0034277, FBGN0030734	95	188	6122	4.79888	0.000354394	0.000177213	0.00506809
KEGG_PATHWAY	dme00510:N-Glycan biosynthesis	7	5.69106	1.52877e-05	FBGN0037743, FBGN0032477, FBGN0263852, FBGN0032799, FBGN0034277, FBGN0011336, FBGN0261020	38	33	2103	11.7392	0.000397404	0.000198722	0.0125364
KEGG_PATHWAY	dme04141:Protein processing in endoplasmic reticulum	11	8.94309	1.27033e-05	FBGN0032398, FBGN0261984, FBGN0023529, FBGN0035909, FBGN0263852, FBGN0034277, FBGN0011336, FBGN0039875, FBGN0005585, FBGN0262126, FBGN0013278	38	112	2103	5.43539	0.000330234	0.000330234	0.0104172
UP_KEYWORDS	Signal-anchor	7	5.69106	4.40724e-05	FBGN0262801, FBGN0031530, FBGN0053774, FBGN0014906, FBGN0039172, FBGN0086674, FBGN0261020	115	46	7971	10.5476	0.00387095	0.000775391	0.0477271
GOTERM_CC_DIRECT	GO:0005783~endoplasmic reticulum	12	9.7561	5.70859e-05	FBGN0262801, FBGN0037743, FBGN0263260, FBGN0031260, FBGN0039875, FBGN0005585, FBGN0260855, FBGN0030734, FBGN0267330, FBGN0261020, FBGN0034389, FBGN0040491	95	172	6122	4.49596	0.00415871	0.00138816	0.0595698
GOTERM_CC_DIRECT	GO:0008250~oligosaccharyltransferase complex	4	3.25203	0.000117363	FBGN0263852, FBGN0034277, FBGN0011336, FBGN0053774	95	7	6122	36.8241	0.00853143	0.00213972	0.122435
GOTERM_MF_DIRECT	GO:0008233~peptidase activity	5	4.06504	0.000181352	FBGN0262801, FBGN0033431, FBGN0039172, FBGN0030521, FBGN0028983	86	20	5738	16.6802	0.0236564	0.0236564	0.211563
GOTERM_CC_DIRECT	GO:0000139~Golgi membrane	7	5.69106	0.00290961	FBGN0053635, FBGN0031530, FBGN0035909, FBGN0024994, FBGN0260855, FBGN0262126, FBGN0086674	95	93	6122	4.85048	0.19161	0.04165	2.99567
UP_KEYWORDS	Glycosyltransferase	7	5.69106	0.00481072	FBGN0037743, FBGN0031530, FBGN0263852, FBGN0032799, FBGN0034277, FBGN0011336, FBGN0261020	115	110	7971	4.41083	0.345815	0.0682843	5.08928
GOTERM_MF_DIRECT	GO:0004579~dolichyl-diphosphooligosaccharide-protein glycotransferase activity	3	2.43902	0.00210687	FBGN0263852, FBGN0011336, FBGN0053774	86	5	5738	40.0326	0.243006	0.129946	2.43273
GOTERM_CC_DIRECT	GO:0005789~endoplasmic reticulum membrane	8	6.50407	0.01152	FBGN0037743, FBGN0032477, FBGN0035909, FBGN0032799, FBGN0034756, FBGN0033302, FBGN0267330, FBGN0261020	95	161	6122	3.20209	0.570802	0.131487	11.3915
UP_SEQ_FEATURE	topological domain:Cytoplasmic	9	7.31707	0.00272435	FBGN0003328, FBGN0031530, FBGN0086365, FBGN0039875, FBGN0019952, FBGN0014906, FBGN0039172, FBGN0086674, FBGN0267330	31	186	2182	3.40583	0.249073	0.13344	3.00956
UP_SEQ_FEATURE	topological domain:Lumenal	5	4.06504	0.00497165	FBGN0031530, FBGN0039875, FBGN0039172, FBGN0086674, FBGN0267330	31	52	2182	6.76799	0.407453	0.160074	5.42978
GOTERM_BP_DIRECT	GO:0015695~organic cation transport	3	2.43902	0.00341973	FBGN0086365, FBGN0019952, FBGN0038404	99	6	6328	31.9596	0.669274	0.198518	4.52364
GOTERM_BP_DIRECT	GO:0007030~Golgi organization	6	4.87805	0.00413086	FBGN0261984, FBGN0027607, FBGN0035909, FBGN0264560, FBGN0262126, FBGN0261020	99	69	6328	5.55819	0.737375	0.199756	5.4402
KEGG_PATHWAY	dme03060:Protein export	3	2.43902	0.0558009	FBGN0262801, FBGN0039172, FBGN0011509	38	22	2103	7.54665	0.775274	0.220274	37.5544
COG_ONTOLOGY	Intracellular trafficking and secretion	3	2.43902	0.0831275	FBGN0262801, FBGN0039727, FBGN0260855	16	30	919	5.74375	0.405908	0.229226	33.9891
KEGG_PATHWAY	dme04142:Lysosome	5	4.06504	0.0310112	FBGN0051072, FBGN0033431, FBGN0034117, FBGN0030521, FBGN0032074	38	69	2103	4.0103	0.559153	0.238922	22.7669
KEGG_PATHWAY	dme00052:Galactose metabolism	3	2.43902	0.0512858	FBGN0086254, FBGN0263200, FBGN0034117	38	21	2103	7.90602	0.745598	0.239492	35.063
GOTERM_BP_DIRECT	GO:0046680~response to DDT	4	3.25203	0.00339136	FBGN0050489, FBGN0034756, FBGN0053503, FBGN0033302	99	20	6328	12.7838	0.66622	0.23991	4.48692
UP_SEQ_FEATURE	transmembrane region	12	9.7561	0.00272067	FBGN0003328, FBGN0037743, FBGN0031530, FBGN0086365, FBGN0263852, FBGN0039875, FBGN0019952, FBGN0053774, FBGN0014906, FBGN0039172, FBGN0086674, FBGN0267330	31	327	2182	2.58301	0.248783	0.248783	3.00555
GOTERM_BP_DIRECT	GO:0006486~protein glycosylation	5	4.06504	0.00266674	FBGN0037743, FBGN0031530, FBGN0263852, FBGN0032799, FBGN0011336	99	38	6328	8.41042	0.577898	0.249865	3.54417
GOTERM_BP_DIRECT	GO:0006465~signal peptide processing	3	2.43902	0.00625565	FBGN0262801, FBGN0031260, FBGN0039172	99	8	6328	23.9697	0.868259	0.251407	8.13049
KEGG_PATHWAY	dme00051:Fructose and mannose metabolism	3	2.43902	0.0469122	FBGN0037279, FBGN0036300, FBGN0086254	38	20	2103	8.30132	0.713282	0.268248	32.5668
GOTERM_BP_DIRECT	GO:0019348~dolichol metabolic process	3	2.43902	0.00230304	FBGN0032477, FBGN0032799, FBGN0261020	99	5	6328	38.3515	0.525141	0.3109	3.06775
UP_KEYWORDS	Lectin	3	2.43902	0.0325738	FBGN0031289, FBGN0031530, FBGN0005585	115	20	7971	10.397	0.945754	0.340529	30.1416
GOTERM_CC_DIRECT	GO:0005840~ribosome	5	4.06504	0.0411136	FBGN0035422, FBGN0086472, FBGN0030136, FBGN0029785, FBGN0039359	95	85	6122	3.79071	0.953334	0.354557	35.4811
COG_ONTOLOGY	Secondary metabolites biosynthesis, transport, and catabolism	4	3.25203	0.0714517	FBGN0050489, FBGN0034756, FBGN0053503, FBGN0033302	16	61	919	3.76639	0.359046	0.359046	29.868
GOTERM_CC_DIRECT	GO:0005787~signal peptidase complex	2	1.62602	0.0600321	FBGN0262801, FBGN0039172	95	4	6122	32.2211	0.989104	0.431597	47.5971
GOTERM_MF_DIRECT	GO:0005215~transporter activity	5	4.06504	0.0137672	FBGN0051072, FBGN0045866, FBGN0035236, FBGN0028491, FBGN0038404	86	63	5738	5.29531	0.839569	0.45663	14.9455
GOTERM_CC_DIRECT	GO:0005793~endoplasmic reticulum-Golgi intermediate compartment	2	1.62602	0.0744742	FBGN0035449, FBGN0035909	95	5	6122	25.7768	0.996481	0.466206	55.4174
UP_KEYWORDS	Monooxygenase	4	3.25203	0.0731931	FBGN0050489, FBGN0034756, FBGN0053503, FBGN0033302	115	68	7971	4.07724	0.998755	0.487722	56.1023
UP_KEYWORDS	Signal	24	19.5122	0.0728091	FBGN0032398, FBGN0261984, FBGN0051072, FBGN0045866, FBGN0035909, FBGN0046302, FBGN0005585, FBGN0033431, FBGN0014906, FBGN0034117, FBGN0038829, FBGN0265137, FBGN0051704, FBGN0050154, FBGN0027930, FBGN0030521, FBGN0038595, FBGN0023529, FBGN0003328, FBGN0263260, FBGN0034277, FBGN0039875, FBGN0001987, FBGN0030734	115	1182	7971	1.40737	0.998709	0.522485	55.905
UP_KEYWORDS	Disulfide bond	9	7.31707	0.0896811	FBGN0003328, FBGN0031530, FBGN0263260, FBGN0005585, FBGN0033431, FBGN0034117, FBGN0027930, FBGN0086674, FBGN0038595	115	322	7971	1.93732	0.999744	0.528428	63.8589
UP_KEYWORDS	Heme	4	3.25203	0.0976266	FBGN0050489, FBGN0034756, FBGN0053503, FBGN0033302	115	77	7971	3.60068	0.999881	0.529204	67.1328
UP_KEYWORDS	Receptor	6	4.87805	0.0664486	FBGN0051072, FBGN0003328, FBGN0000568, FBGN0041092, FBGN0011509, FBGN0267330	115	152	7971	2.73604	0.997644	0.530624	52.5157
GOTERM_MF_DIRECT	GO:0020037~heme binding	5	4.06504	0.0353508	FBGN0000568, FBGN0050489, FBGN0034756, FBGN0053503, FBGN0033302	86	84	5738	3.97148	0.991355	0.54697	34.313
GOTERM_MF_DIRECT	GO:0030246~carbohydrate binding	4	3.25203	0.0318678	FBGN0031289, FBGN0031530, FBGN0035236, FBGN0005585	86	47	5738	5.67838	0.986088	0.57472	31.4895
GOTERM_MF_DIRECT	GO:0004497~monooxygenase activity	4	3.25203	0.0611211	FBGN0050489, FBGN0034756, FBGN0053503, FBGN0033302	86	61	5738	4.37514	0.999758	0.603472	52.1195
GOTERM_MF_DIRECT	GO:0016705~oxidoreductase activity, acting on paired donors, with incorporation or reduction of molecular oxygen	4	3.25203	0.0611211	FBGN0050489, FBGN0034756, FBGN0053503, FBGN0033302	86	61	5738	4.37514	0.999758	0.603472	52.1195
GOTERM_MF_DIRECT	GO:0004582~dolichyl-phosphate beta-D-mannosyltransferase activity	2	1.62602	0.0294102	FBGN0032799, FBGN0261020	86	2	5738	66.7209	0.980559	0.626595	29.4309
GOTERM_MF_DIRECT	GO:0004169~dolichyl-phosphate-mannose-protein mannosyltransferase activity	2	1.62602	0.0579652	FBGN0032799, FBGN0261020	86	4	5738	33.3605	0.999623	0.62666	50.2061
GOTERM_MF_DIRECT	GO:0016620~oxidoreductase activity, acting on the aldehyde or oxo group of donors, NAD or NADP as acceptor	2	1.62602	0.0719298	FBGN0032945, FBGN0037758	86	5	5738	26.6884	0.999947	0.626692	58.1749
GOTERM_MF_DIRECT	GO:0044212~transcription regulatory region DNA binding	3	2.43902	0.0522077	FBGN0003053, FBGN0029939, FBGN0002576	86	25	5738	8.00651	0.999156	0.636188	46.5341
GOTERM_BP_DIRECT	GO:0007029~endoplasmic reticulum organization	3	2.43902	0.0247379	FBGN0035909, FBGN0262126, FBGN0261020	99	16	6328	11.9848	0.999694	0.636274	28.7161
GOTERM_BP_DIRECT	GO:0009298~GDP-mannose biosynthetic process	2	1.62602	0.0457515	FBGN0037279, FBGN0036300	99	3	6328	42.6128	1	0.747194	46.8925
GOTERM_BP_DIRECT	GO:0019233~sensory perception of pain	12	9.7561	0.0378196	FBGN0051072, FBGN0032477, FBGN0035909, FBGN0263773, FBGN0035236, FBGN0000721, FBGN0264560, FBGN0029939, FBGN0265137, FBGN0262126, FBGN0030521, FBGN0267330	99	390	6328	1.96674	0.999996	0.749334	40.6067
GOTERM_BP_DIRECT	GO:0002181~cytoplasmic translation	5	4.06504	0.0422581	FBGN0035422, FBGN0086472, FBGN0030136, FBGN0029785, FBGN0039359	99	85	6328	3.75995	0.999999	0.752071	44.2041
SMART	SM00587:CHK	3	2.43902	0.0429452	FBGN0037934, FBGN0036956, FBGN0037935	34	33	3269	8.74064	0.811375	0.811375	32.7458
GOTERM_BP_DIRECT	GO:0035269~protein O-linked mannosylation	2	1.62602	0.0605367	FBGN0032799, FBGN0261020	99	4	6328	31.9596	1	0.813785	56.9956
GOTERM_BP_DIRECT	GO:0017085~response to insecticide	2	1.62602	0.0750951	FBGN0050489, FBGN0053503	99	5	6328	25.5677	1	0.856238	65.178
GOTERM_BP_DIRECT	GO:0009306~protein secretion	3	2.43902	0.0919866	FBGN0264560, FBGN0262126, FBGN0086674	99	33	6328	5.81084	1	0.874805	72.8556
GOTERM_BP_DIRECT	GO:0007311~maternal specification of dorsal/ventral axis, oocyte, germ-line encoded	2	1.62602	0.0894302	FBGN0045866, FBGN0263260	99	6	6328	21.3064	1	0.884841	71.8044
GOTERM_BP_DIRECT	GO:0006488~dolichol-linked oligosaccharide biosynthetic process	2	1.62602	0.0894302	FBGN0037743, FBGN0032477	99	6	6328	21.3064	1	0.884841	71.8044
INTERPRO	IPR001128:Cytochrome P450	4	3.25203	0.0584479	FBGN0050489, FBGN0034756, FBGN0053503, FBGN0033302	105	60	7043	4.47175	0.999999	0.89337	53.6202
INTERPRO	IPR001173:Glycosyl transferase, family 2	3	2.43902	0.0108898	FBGN0031530, FBGN0032799, FBGN0261020	105	11	7043	18.2935	0.91299	0.91299	13.0367
INTERPRO	IPR020846:Major facilitator superfamily domain	5	4.06504	0.0565156	FBGN0086365, FBGN0019952, FBGN0034392, FBGN0028491, FBGN0038404	105	98	7043	3.42225	0.999998	0.925326	52.3911
INTERPRO	IPR015897:CHK kinase-like	3	2.43902	0.0848482	FBGN0037934, FBGN0036956, FBGN0037935	105	33	7043	6.09784	1	0.940669	67.7327
INTERPRO	IPR004119:Protein of unknown function DUF227	3	2.43902	0.0848482	FBGN0037934, FBGN0036956, FBGN0037935	105	33	7043	6.09784	1	0.940669	67.7327
INTERPRO	IPR017972:Cytochrome P450, conserved site	4	3.25203	0.0515628	FBGN0050489, FBGN0034756, FBGN0053503, FBGN0033302	105	57	7043	4.7071	0.999993	0.947733	49.1026
INTERPRO	IPR009011:Mannose-6-phosphate receptor binding domain	2	1.62602	0.0436545	FBGN0032398, FBGN0051072	105	3	7043	44.7175	0.999952	0.963773	43.4151
INTERPRO	IPR002401:Cytochrome P450, E-class, group I	4	3.25203	0.0430432	FBGN0050489, FBGN0034756, FBGN0053503, FBGN0033302	105	53	7043	5.06235	0.999945	0.992596	42.952
